# Supplementary material
Source: publisher figshare collection journal article supplement (https://tandf.figshare.com/articles/dataset/_/24598142)
Supplement: Supplementary file 1 [file 1]

## Sheet: sheet1
Genes that covered at least one DMRs(q<0.05)
ID Gene Name Species COG_ONTOLOGY GOTERM_BP_DIRECT GOTERM_CC_DIRECT GOTERM_MF_DIRECT INTERPRO KEGG_PATHWAY PIR_SUPERFAMILY SMART UP_KW_BIOLOGICAL_PROCESS UP_KW_CELLULAR_COMPONENT UP_KW_DISEASE UP_KW_DOMAIN UP_KW_LIGAND UP_KW_MOLECULAR_FUNCTION UP_KW_PTM UP_SEQ_FEATURE
ENSBTAG00000001036 3-hydroxyisobutyrate dehydrogenase(HIBADH) Bos taurus GO:0006574~valine catabolic process,GO:0009083~branched-chain amino acid catabolic process, GO:0005739~mitochondrion, GO:0008442~3-hydroxyisobutyrate dehydrogenase activity,GO:0016616~oxidoreductase activity, acting on the CH-OH group of donors, NAD or NADP as acceptor,GO:0050661~NADP binding,GO:0051287~NAD binding, IPR00611…
ENSBTAG00000033186 3-oxoacid CoA-transferase 1(OXCT1) Bos taurus Lipid metabolism, GO:0042182~ketone catabolic process,GO:0046950~cellular ketone body metabolic process,GO:0046952~ketone body catabolic process, GO:0005739~mitochondrion, GO:0008260~3-oxoacid CoA-transferase activity,GO:0008410~CoA-transferase activity, IPR004163:Coenzyme A transferase binding site,IPR004164:Coenzyme A transferase …
ENSBTAG00000024311 4'-phosphopantetheinyl transferase (G3MZI2_BOVIN) Bos taurus GO:0019878~lysine biosynthetic process via aminoadipic acid, GO:0005829~cytosol, GO:0000287~magnesium ion binding,GO:0008897~holo-[acyl-carrier-protein] synthase activity, IPR008278:4'-phosphopantetheinyl transferase superfamily, KW-0808~Transferase, DOMAIN:ACPS,
ENSBTAG00000053164 40S ribosomal protein S15a pseudogene(LOC524269) Bos taurus GO:0006412~translation, GO:0022627~cytosolic small ribosomal subunit, GO:0003735~structural constituent of ribosome, IPR000630:Ribosomal protein S8,
ENSBTAG00000026063 40S ribosomal protein S6-like(LOC112445195) Bos taurus GO:0006412~translation, GO:0005840~ribosome, GO:0003735~structural constituent of ribosome, IPR001377:Ribosomal protein S6e, SM01405:SM01405, KW-0687~Ribonucleoprotein,KW-0689~Ribosomal protein,
ENSBTAG00000027075 60S ribosomal protein L35(LOC100337442) Bos taurus GO:0000463~maturation of LSU-rRNA from tricistronic rRNA transcript (SSU-rRNA, 5.8S rRNA, LSU-rRNA),GO:0006412~translation, GO:0022625~cytosolic large ribosomal subunit, GO:0003729~mRNA binding,GO:0003735~structural constituent of ribosome, IPR001854:Ribosomal protein L29,IPR018254:Ribosomal protein L29, conserved site, KW-0175…
ENSBTAG00000006785 ADP-ribosylation factor 2(ARF2) Bos taurus GO:0006886~intracellular protein transport,GO:0016192~vesicle-mediated transport, GO:0005794~Golgi apparatus,GO:0005886~plasma membrane, GO:0003924~GTPase activity,GO:0005525~GTP binding, IPR005225:Small GTP-binding protein domain,IPR006689:Small GTPase superfamily, ARF/SAR type,IPR027417:P-loop containing nucleoside triphosphate hydro…
ENSBTAG00000037550 ARL14 effector protein-like pseudogene(LOC112441485) Bos taurus DOMAIN:ARF7EP_C,REGION:Disordered,
ENSBTAG00000005653 ATP binding cassette subfamily B member 4(ABCB4) Bos taurus GO:0032376~positive regulation of cholesterol transport,GO:0045332~phospholipid translocation,GO:0055088~lipid homeostasis,GO:0061092~positive regulation of phospholipid translocation,GO:1903413~cellular response to bile acid, GO:0005654~nucleoplasm,GO:0005829~cytosol,GO:0005886~plasma membrane,GO:0005925~focal adhesio…
ENSBTAG00000006920 ATP binding cassette subfamily F member 3(ABCF3) Bos taurus General function prediction only, GO:0005524~ATP binding,GO:0042626~ATPase activity, coupled to transmembrane movement of substances, IPR003439:ABC transporter-like,IPR003593:AAA+ ATPase domain,IPR017871:ABC transporter, conserved site,IPR027417:P-loop containing nucleoside triphosphate hydrolase, SM00382:AAA, COMPBIAS…
ENSBTAG00000006600 Actin-related protein 2/3 complex subunit 2 (F1MEL0_BOVIN) Bos taurus GO:0030041~actin filament polymerization,GO:0034314~Arp2/3 complex-mediated actin nucleation, GO:0005737~cytoplasm,GO:0005885~Arp2/3 protein complex,GO:0043005~neuron projection,GO:0045202~synapse, GO:0005200~structural constituent of cytoskeleton,GO:0051015~actin filament binding, IPR007188:ARP2/3 complex, 3…
ENSBTAG00000012534 BEN domain containing 3(BEND3) Bos taurus GO:0000122~negative regulation of transcription from RNA polymerase II promoter,GO:0000183~chromatin silencing at rDNA,GO:0006306~DNA methylation,GO:0034773~histone H4-K20 trimethylation,GO:0036124~histone H3-K9 trimethylation,GO:0043967~histone H4 acetylation,GO:0051260~protein homooligomerization,GO:0080182~histone H3-K4 trimethylatio…
ENSBTAG00000009144 BPI fold containing family A, member 2A(BPIFA2A) Bos taurus GO:0005576~extracellular region,GO:0030141~secretory granule, GO:0001530~lipopolysaccharide binding, IPR017942:Lipid-binding serum glycoprotein, N-terminal,IPR017943:Bactericidal permeability-increasing protein, alpha/beta domain, KW-0964~Secreted, KW-0732~Signal, KW-1015~Disulfide bond, DOMAIN:BPI1,
ENSBTAG00000006167 BTB (POZ) domain containing 8(BTBD8) Bos taurus GO:0005654~nucleoplasm,GO:0098793~presynapse, IPR000210:BTB/POZ-like,IPR011333:BTB/POZ fold, SM00225:BTB, COMPBIAS:Basic and acidic residues,COMPBIAS:Polar residues,DOMAIN:BTB,DOMAIN:DUF4596,REGION:Disordered,
ENSBTAG00000047411 BTB domain-containing protein (G3N038_BOVIN) Bos taurus GO:0007281~germ cell development, GO:0005634~nucleus, IPR000210:BTB/POZ-like,IPR011333:BTB/POZ fold, SM00225:BTB, KW-0217~Developmental protein,KW-9996~Developmental protein, COMPBIAS:Basic and acidic residues,DOMAIN:BTB,REGION:Disordered,
ENSBTAG00000050467 Bardet-Biedl syndrome 10(BBS10) Bos taurus GO:0043254~regulation of protein complex assembly,GO:0045494~photoreceptor cell maintenance,GO:0051131~chaperone-mediated protein complex assembly,GO:1905515~non-motile cilium assembly, GO:0005524~ATP binding,GO:0061629~RNA polymerase II sequence-specific DNA binding transcription factor binding, IPR002423:Chaperonin Cpn60/TCP-1,IPR027…
ENSBTAG00000013405 CBY1 interacting BAR domain containing 1(CIBAR1) Bos taurus GO:0007007~inner mitochondrial membrane organization,GO:0030030~cell projection organization,GO:0035108~limb morphogenesis,GO:0045880~positive regulation of smoothened signaling pathway,GO:0060271~cilium assembly, GO:0005634~nucleus,GO:0005737~cytoplasm,GO:0005743~mitochondrial inner membrane,GO:0005814~centriole,GO:00…
ENSBTAG00000049042 CCDC144C domain-containing protein (A0A3Q1LKG7_BOVIN) Bos taurus KW-0175~Coiled coil, DOMAIN:CCDC144C,
ENSBTAG00000012700 CD247 molecule(CD247) Bos taurus GO:0007166~cell surface receptor signaling pathway,GO:0050852~T cell receptor signaling pathway,GO:0065003~macromolecular complex assembly, GO:0005737~cytoplasm,GO:0005886~plasma membrane,GO:0016021~integral component of membrane,GO:0042101~T cell receptor complex,GO:0042105~alpha-beta T cell receptor complex, GO:0004888~transmembrane signaling …
ENSBTAG00000054686 CRACD like(CRACDL) Bos taurus IPR026713:Probable exonuclease mut-7 homolog, isoform 5, COMPBIAS:Basic and acidic residues,COMPBIAS:Polar residues,COMPBIAS:Pro residues,DOMAIN:DUF4592,REGION:Disordered,
ENSBTAG00000038281 CUB and Sushi multiple domains 3(CSMD3) Bos taurus GO:0050773~regulation of dendrite development, GO:0005886~plasma membrane,GO:0016021~integral component of membrane, IPR000436:Sushi/SCR/CCP,IPR000859:CUB domain, SM00032:CCP,SM00042:CUB, KW-0472~Membrane, KW-0768~Sushi,KW-0812~Transmembrane,KW-1133~Transmembrane helix, DOMAIN:CUB,DOMAIN:Sushi,REGION:Disordered,TRANSMEM:Helical,
ENSBTAG00000001751 CXXC finger protein 4(CXXC4) Bos taurus GO:0005634~nucleus,GO:0005737~cytoplasm, GO:0008270~zinc ion binding,GO:0008327~methyl-CpG binding, IPR002857:Zinc finger, CXXC-type, bta04310:Wnt signaling pathway, KW-0479~Metal-binding,KW-0862~Zinc, KW-0238~DNA-binding, COMPBIAS:Polar residues,DOMAIN:CXXC-type,REGION:Disordered,
ENSBTAG00000022027 D-dopachrome tautomerase(DDT) Bos taurus GO:0042438~melanin biosynthetic process, GO:0005737~cytoplasm, GO:0033981~D-dopachrome decarboxylase activity, IPR001398:Macrophage migration inhibitory factor,IPR014347:Tautomerase/MIF superfamily, KW-0470~Melanin biosynthesis, KW-0963~Cytoplasm, KW-0456~Lyase, KW-0007~Acetylation,
ENSBTAG00000005796 DDB1 and CUL4 associated factor 8(DCAF8) Bos taurus GO:0005654~nucleoplasm,GO:0005737~cytoplasm,GO:0005739~mitochondrion,GO:0005829~cytosol,GO:0080008~Cul4-RING E3 ubiquitin ligase complex, IPR001680:WD40 repeat,IPR015943:WD40/YVTN repeat-like-containing domain, SM00320:WD40, KW-0677~Repeat, COMPBIAS:Basic and acidic residues,COMPBIAS:Polar residues,REGION:Disordered,REPEAT:WD,
ENSBTAG00000005372 DLG associated protein 1(DLGAP1) Bos taurus GO:0007268~chemical synaptic transmission,GO:0098962~regulation of postsynaptic neurotransmitter receptor activity, GO:0045202~synapse,GO:0098978~glutamatergic synapse,GO:0099572~postsynaptic specialization, GO:0060090~binding, bridging, IPR005026:Guanylate-kinase-associated protein, bta04724:Glutamatergic synapse, KW-0175~Coiled coil…
ENSBTAG00000013535 DNA fragmentation factor subunit alpha(DFFA) Bos taurus GO:0006309~apoptotic DNA fragmentation,GO:0042981~regulation of apoptotic process,GO:1900118~negative regulation of execution phase of apoptosis, GO:0060703~deoxyribonuclease inhibitor activity, IPR003508:Caspase-activated nuclease CIDE-N,IPR015121:DNA fragmentation factor 45kDa, middle domain,IPR017299:DNA fragmentation f…
ENSBTAG00000021544 EBNA1 binding protein 2(EBNA1BP2) Bos taurus GO:0006364~rRNA processing,GO:0042254~ribosome biogenesis,GO:0042273~ribosomal large subunit biogenesis, GO:0005694~chromosome,GO:0005730~nucleolus,GO:0030687~preribosome, large subunit precursor,GO:0034399~nuclear periphery, IPR008610:Eukaryotic rRNA processing, KW-0690~Ribosome biogenesis, KW-0539~Nucleus, KW-0175~Coiled coil, COMP…
ENSBTAG00000034626 F-box protein 16(FBXO16) Bos taurus IPR001810:F-box domain, cyclin-like, SM00256:FBOX, COMPBIAS:Basic and acidic residues,COMPBIAS:Polar residues,DOMAIN:F-box,REGION:Disordered,
ENSBTAG00000010071 F-box protein 3(FBXO3) Bos taurus GO:0005654~nucleoplasm,GO:0005829~cytosol, IPR001810:F-box domain, cyclin-like,IPR007474:ApaG domain,IPR018958:Cell wall assembly/cell proliferation coordinating protein, KNR4-like, SM00256:FBOX,SM00860:SM00860, KW-0833~Ubl conjugation pathway, KW-0539~Nucleus, COMPBIAS:Acidic residues,DOMAIN:ApaG,DOMAIN:F-box,REGION:Disordered,
ENSBTAG00000006715 F-box protein 8(FBXO8) Bos taurus GO:0006511~ubiquitin-dependent protein catabolic process,GO:0032012~regulation of ARF protein signal transduction,GO:0050790~regulation of catalytic activity, GO:0000151~ubiquitin ligase complex, GO:0005085~guanyl-nucleotide exchange factor activity, IPR000904:SEC7-like,IPR001810:F-box domain, cyclin-like,IPR023394:SEC7-like, alpha orthogonal b…
ENSBTAG00000009789 G protein subunit alpha q(GNAQ) Bos taurus GO:0001508~action potential,GO:0006469~negative regulation of protein kinase activity,GO:0007188~adenylate cyclase-modulating G-protein coupled receptor signaling pathway,GO:0007189~adenylate cyclase-activating G-protein coupled receptor signaling pathway,GO:0007213~G-protein coupled acetylcholine receptor signaling pathway,GO:0007215~…
ENSBTAG00000053030 G protein-coupled receptor 27(GPR27) Bos taurus GO:0035774~positive regulation of insulin secretion involved in cellular response to glucose stimulus,GO:1900738~positive regulation of phospholipase C-activating G-protein coupled receptor signaling pathway, GO:0005886~plasma membrane,GO:0016021~integral component of membrane, GO:0004930~G-protein coupled receptor activity, IPR00…
ENSBTAG00000013732 G protein-coupled receptor 37(GPR37) Bos taurus GO:0007193~adenylate cyclase-inhibiting G-protein coupled receptor signaling pathway,GO:0031987~locomotion involved in locomotory behavior,GO:0042416~dopamine biosynthetic process,GO:0043410~positive regulation of MAPK cascade,GO:0045964~positive regulation of dopamine metabolic process,GO:1903206~negative regulation of hydrogen p…
ENSBTAG00000018663 G protein-coupled receptor class C group 5 member C(GPRC5C) Bos taurus GO:0006357~regulation of transcription from RNA polymerase II promoter,GO:0007186~G-protein coupled receptor signaling pathway,GO:0050790~regulation of catalytic activity, GO:0005634~nucleus,GO:0005886~plasma membrane,GO:0016021~integral component of membrane,GO:0043235~receptor complex, GO:0004930~G-protein…
ENSBTAG00000014467 GLIS family zinc finger 3(GLIS3) Bos taurus General function prediction only, GO:0006357~regulation of transcription from RNA polymerase II promoter, GO:0005634~nucleus, GO:0000978~RNA polymerase II core promoter proximal region sequence-specific DNA binding,GO:0000981~RNA polymerase II transcription factor activity, sequence-specific DNA binding,GO:0046872~metal ion binding, I…
ENSBTAG00000008275 GREB1 like retinoic acid receptor coactivator(GREB1L) Bos taurus GO:0001656~metanephros development,GO:0001658~branching involved in ureteric bud morphogenesis,GO:0001822~kidney development,GO:0003231~cardiac ventricle development,GO:0030539~male genitalia development,GO:0060065~uterus development,GO:0061205~paramesonephric duct development,GO:0072177~mesonephric duct developme…
ENSBTAG00000054649 GTPase, IMAP family member 4-like(LOC768255) Bos taurus GO:0005829~cytosol, GO:0005525~GTP binding, IPR006703:AIG1,IPR027417:P-loop containing nucleoside triphosphate hydrolase, KW-0175~Coiled coil, KW-0342~GTP-binding,KW-0547~Nucleotide-binding, DOMAIN:AIG1-type G,
ENSBTAG00000054293 Glutaredoxin domain-containing protein (A0A3Q1LQQ0_BOVIN) Bos taurus GO:0097573~glutathione oxidoreductase activity, IPR002109:Glutaredoxin,IPR014025:Glutaredoxin subgroup, DOMAIN:Glutaredoxin,
ENSBTAG00000008389 HtrA serine peptidase 1(HTRA1) Bos taurus Posttranslational modification, protein turnover, chaperones, GO:0001890~placenta development,GO:0030512~negative regulation of transforming growth factor beta receptor signaling pathway,GO:0030514~negative regulation of BMP signaling pathway,GO:0060718~chorionic trophoblast cell differentiation, GO:0005576~extracellular region,GO:00058…
ENSBTAG00000052008 IG domain-containing protein (G3MYM5_BOVIN) Bos taurus GO:0007166~cell surface receptor signaling pathway, GO:0005886~plasma membrane, IPR003599:Immunoglobulin subtype,IPR013106:Immunoglobulin V-set,IPR013783:Immunoglobulin-like fold, SM00409:IG, KW-0732~Signal, KW-0325~Glycoprotein, DOMAIN:IG,
ENSBTAG00000014016 IKAROS family zinc finger 1(IKZF1) Bos taurus GO:0006357~regulation of transcription from RNA polymerase II promoter,GO:0030098~lymphocyte differentiation,GO:0030218~erythrocyte differentiation, GO:0005654~nucleoplasm,GO:0005721~pericentric heterochromatin,GO:0005829~cytosol,GO:0032991~macromolecular complex, GO:0000978~RNA polymerase II core promoter proximal region sequence-s…
ENSBTAG00000046161 Ig heavy chain V region MC101-like(LOC100301305) Bos taurus GO:0006910~phagocytosis, recognition,GO:0006911~phagocytosis, engulfment,GO:0006958~complement activation, classical pathway,GO:0042742~defense response to bacterium,GO:0045087~innate immune response,GO:0050853~B cell receptor signaling pathway,GO:0050871~positive regulation of B cell activation, GO:0009897~external si…
ENSBTAG00000053682 Ig-like domain-containing protein (A0A3Q1M199_BOVIN) Bos taurus GO:0007166~cell surface receptor signaling pathway, GO:0005886~plasma membrane, IPR003599:Immunoglobulin subtype,IPR007110:Immunoglobulin-like domain,IPR013106:Immunoglobulin V-set,IPR013783:Immunoglobulin-like fold, SM00406:IGv,SM00409:IG, KW-0732~Signal, KW-0325~Glycoprotein, DOMAIN:Ig-like,
ENSBTAG00000052267 Ig-like domain-containing protein (A0A3Q1N4T6_BOVIN) Bos taurus GO:0006955~immune response, GO:0005615~extracellular space, IPR003599:Immunoglobulin subtype,IPR007110:Immunoglobulin-like domain,IPR013106:Immunoglobulin V-set,IPR013783:Immunoglobulin-like fold, SM00406:IGv,SM00409:IG, KW-0732~Signal, KW-0325~Glycoprotein, DOMAIN:Ig-like,
ENSBTAG00000038605 Ig-like domain-containing protein (E1BAE6_BOVIN) Bos taurus GO:0007166~cell surface receptor signaling pathway, GO:0005886~plasma membrane, IPR003599:Immunoglobulin subtype,IPR007110:Immunoglobulin-like domain,IPR013106:Immunoglobulin V-set,IPR013783:Immunoglobulin-like fold, SM00409:IG, KW-0732~Signal, KW-0325~Glycoprotein, DOMAIN:Ig-like,
ENSBTAG00000050773 Ig-like domain-containing protein (E1BKL1_BOVIN) Bos taurus GO:0007166~cell surface receptor signaling pathway, GO:0005886~plasma membrane, IPR003599:Immunoglobulin subtype,IPR007110:Immunoglobulin-like domain,IPR013106:Immunoglobulin V-set,IPR013783:Immunoglobulin-like fold, SM00406:IGv,SM00409:IG, KW-0325~Glycoprotein, DOMAIN:Ig-like,
ENSBTAG00000051147 Ig-like domain-containing protein (E1BN29_BOVIN) Bos taurus GO:0007166~cell surface receptor signaling pathway, GO:0005886~plasma membrane, IPR007110:Immunoglobulin-like domain,IPR013106:Immunoglobulin V-set,IPR013783:Immunoglobulin-like fold, COMPBIAS:Polar residues,DOMAIN:Ig-like,REGION:Disordered,
ENSBTAG00000051816 KRAB domain-containing protein (A0A3Q1LXL2_BOVIN) Bos taurus GO:0006355~regulation of transcription, DNA-templated, IPR001909:Krueppel-associated box, SM00349:KRAB, DOMAIN:KRAB,
ENSBTAG00000032485 LHFPL tetraspan subfamily member 1(LHFPL1) Bos taurus GO:0016020~membrane,GO:0016021~integral component of membrane, IPR019372:Lipoma HMGIC fusion partner-like protein, KW-0472~Membrane, KW-0812~Transmembrane,KW-1133~Transmembrane helix, TRANSMEM:Helical,
ENSBTAG00000005354 LRR binding FLII interacting protein 1(LRRFIP1) Bos taurus GO:0006355~regulation of transcription, DNA-templated,GO:0006357~regulation of transcription from RNA polymerase II promoter, GO:0000978~RNA polymerase II core promoter proximal region sequence-specific DNA binding,GO:0000981~RNA polymerase II transcription factor activity, sequence-specific DNA binding, IPR019139:Leuci…
ENSBTAG00000008443 La ribonucleoprotein 1, translational regulator(LARP1) Bos taurus GO:0003723~RNA binding, IPR006607:Protein of unknown function DM15,IPR006630:RNA-binding protein Lupus La, SM00684:DM15,SM00715:LA, COMPBIAS:Basic and acidic residues,COMPBIAS:Polar residues,DOMAIN:HTH La-type RNA-binding,REGION:Disordered,
ENSBTAG00000011153 MGAT4 family member C(MGAT4C) Bos taurus GO:0006487~protein N-linked glycosylation, GO:0016021~integral component of membrane, GO:0008375~acetylglucosaminyltransferase activity, IPR006759:Glycosyl transferase, family 54, bta00510:N-Glycan biosynthesis,bta00513:Various types of N-glycan biosynthesis,bta01100:Metabolic pathways, KW-0472~Membrane, KW-0812~Transmembrane,KW-1133~Tra…
ENSBTAG00000006259 MOB kinase activator 1A(MOB1A) Bos taurus GO:0035329~hippo signaling, GO:0005654~nucleoplasm,GO:0005730~nucleolus,GO:0005829~cytosol, GO:0016301~kinase activity, IPR005301:Mob1/phocein, bta04390:Hippo signaling pathway,bta04392:Hippo signaling pathway - multiple species, SM01388:SM01388, KW-0418~Kinase,KW-0808~Transferase,
ENSBTAG00000045939 Macrophage-expressed gene 1 protein (A0A3Q1MFZ5_BOVIN) Bos taurus GO:0016021~integral component of membrane,GO:0030659~cytoplasmic vesicle membrane, IPR020864:Membrane attack complex component/perforin (MACPF) domain, SM00457:MACPF, KW-0472~Membrane,KW-0968~Cytoplasmic vesicle, KW-0732~Signal,KW-0812~Transmembrane, KW-0832~Ubl conjugation, DOMAIN:MACPF,REGION:Disordered,TRANSME…
ENSBTAG00000045939 Macrophage-expressed gene 1 protein (A0A3Q1MMN2_BOVIN) Bos taurus GO:0016021~integral component of membrane,GO:0030659~cytoplasmic vesicle membrane, IPR020864:Membrane attack complex component/perforin (MACPF) domain, SM00457:MACPF, KW-0472~Membrane,KW-0968~Cytoplasmic vesicle, KW-0812~Transmembrane, KW-0832~Ubl conjugation, DOMAIN:MACPF,REGION:Disordered,TRANSMEM:Helical,
ENSBTAG00000045939 Macrophage-expressed gene 1 protein (G3N275_BOVIN) Bos taurus GO:0016021~integral component of membrane,GO:0030659~cytoplasmic vesicle membrane, IPR020864:Membrane attack complex component/perforin (MACPF) domain, SM00457:MACPF, KW-0472~Membrane,KW-0968~Cytoplasmic vesicle, KW-0732~Signal,KW-0812~Transmembrane, KW-0832~Ubl conjugation, DOMAIN:MACPF,REGION:Disordered,TRANSMEM:He…
ENSBTAG00000014668 N-acetylglucosamine kinase(NAGK) Bos taurus GO:0019262~N-acetylneuraminate catabolic process,GO:0046835~carbohydrate phosphorylation, GO:0005524~ATP binding,GO:0045127~N-acetylglucosamine kinase activity, IPR002731:ATPase, BadF/BadG/BcrA/BcrD type, bta00520:Amino sugar and nucleotide sugar metabolism,bta01100:Metabolic pathways,bta01250:Biosynthesis of nucleotide sugars, KW-006…
ENSBTAG00000004875 N-alpha-acetyltransferase 60, NatF catalytic subunit(NAA60) Bos taurus GO:0006334~nucleosome assembly,GO:0006474~N-terminal protein amino acid acetylation,GO:0007059~chromosome segregation,GO:0008283~cell proliferation,GO:0017196~N-terminal peptidyl-methionine acetylation,GO:0043966~histone H3 acetylation,GO:0043967~histone H4 acetylation, GO:0000139~Golgi membrane, GO:0004402~…
ENSBTAG00000006051 N-myristoyltransferase 1(NMT1) Bos taurus Lipid metabolism, GO:0001701~in utero embryonic development,GO:0006499~N-terminal protein myristoylation,GO:0018008~N-terminal peptidyl-glycine N-myristoylation,GO:0042180~cellular ketone metabolic process, GO:0005737~cytoplasm,GO:0005829~cytosol,GO:0005886~plasma membrane,GO:0016020~membrane,GO:0019898~extrinsic component of membrane, …
ENSBTAG00000009328 NACHT and WD repeat domain containing 1(NWD1) Bos taurus GO:0010628~positive regulation of gene expression,GO:0032088~negative regulation of NF-kappaB transcription factor activity, GO:0005730~nucleolus,GO:0005829~cytosol, GO:0003824~catalytic activity, IPR001680:WD40 repeat,IPR007111:NACHT nucleoside triphosphatase,IPR011041:Soluble quinoprotein glucose/sorbosone dehydrogenase…
ENSBTAG00000022003 NOP2/Sun RNA methyltransferase 6(NSUN6) Bos taurus GO:0001510~RNA methylation,GO:0002946~tRNA C5-cytosine methylation, GO:0005737~cytoplasm, GO:0000049~tRNA binding,GO:0003723~RNA binding,GO:0008168~methyltransferase activity,GO:0016428~tRNA (cytosine-5-)-methyltransferase activity, IPR001678:Bacterial Fmu (Sun)/eukaryotic nucleolar NOL1/Nop2p,IPR015947:PUA-like domain,IPR01831…
ENSBTAG00000003066 NSA2 ribosome biogenesis homolog (S. cerevisiae)(NSA2) Bos taurus GO:0000460~maturation of 5.8S rRNA,GO:0000470~maturation of LSU-rRNA, GO:0005730~nucleolus,GO:0030687~preribosome, large subunit precursor, IPR022309:Ribosomal protein S8e/ribosomal biogenesis NSA2, KW-0690~Ribosome biogenesis,KW-0698~rRNA processing, KW-0539~Nucleus, KW-0687~Ribonucleoprotein, KW-0597~Phosphopro…
ENSBTAG00000005158 NSF attachment protein gamma(NAPG) Bos taurus GO:0006886~intracellular protein transport,GO:0016192~vesicle-mediated transport, GO:0005739~mitochondrion,GO:0005774~vacuolar membrane,GO:0016020~membrane,GO:0031201~SNARE complex, GO:0005483~soluble NSF attachment protein activity,GO:0019905~syntaxin binding, IPR000744:NSF attachment protein,IPR011990:Tetratricopeptide-like helica…
ENSBTAG00000007247 NUF2 component of NDC80 kinetochore complex(NUF2) Bos taurus GO:0007049~cell cycle,GO:0007052~mitotic spindle organization,GO:0045132~meiotic chromosome segregation,GO:0051301~cell division,GO:0051315~attachment of mitotic spindle microtubules to kinetochore,GO:0051383~kinetochore organization, GO:0000776~kinetochore,GO:0005654~nucleoplasm,GO:0005829~cytosol,GO:0031262~Ndc80 co…
ENSBTAG00000014772 NudC domain containing 2(NUDCD2) Bos taurus GO:0006457~protein folding, GO:0005737~cytoplasm,GO:0005829~cytosol,GO:0045171~intercellular bridge,GO:0072686~mitotic spindle, GO:0051082~unfolded protein binding, IPR007052:CS-like domain,IPR008978:HSP20-like chaperone, DOMAIN:CS,REGION:Disordered,
ENSBTAG00000006868 OTU deubiquitinase 7A(OTUD7A) Bos taurus GO:0035871~protein K11-linked deubiquitination,GO:0043124~negative regulation of I-kappaB kinase/NF-kappaB signaling,GO:0070536~protein K63-linked deubiquitination,GO:0071108~protein K48-linked deubiquitination,GO:0071947~protein deubiquitination involved in ubiquitin-dependent protein catabolic process, GO:0005634~nucleus,GO:0005737~cyt…
ENSBTAG00000053809 Olfactory receptor family 4 subfamily P member 4(OR4P4) Bos taurus GO:0016021~integral component of membrane, GO:0004930~G-protein coupled receptor activity,GO:0004984~olfactory receptor activity, IPR000276:G protein-coupled receptor, rhodopsin-like,IPR000725:Olfactory receptor,IPR017452:GPCR, rhodopsin-like, 7TM, KW-0472~Membrane, KW-0812~Transmembrane, KW-0297~G-protein coupl…
ENSBTAG00000047658 PHD finger protein 7(PHF7) Bos taurus GO:0005634~nucleus,GO:0005794~Golgi apparatus,GO:0005829~cytosol,GO:0005886~plasma membrane,GO:0016607~nuclear speck, GO:0046872~metal ion binding, IPR001841:Zinc finger, RING-type,IPR011011:Zinc finger, FYVE/PHD-type,IPR013083:Zinc finger, RING/FYVE/PHD-type, KW-0479~Metal-binding,KW-0862~Zinc, COMPBIAS:Polar residues,DOMAIN:PHD-type,DOMAI…
ENSBTAG00000020578 PR/SET domain 6(PRDM6) Bos taurus GO:0000122~negative regulation of transcription from RNA polymerase II promoter,GO:0006325~chromatin organization,GO:0010468~regulation of gene expression,GO:0016571~histone methylation,GO:0022008~neurogenesis,GO:0051151~negative regulation of smooth muscle cell differentiation, GO:0005634~nucleus, GO:0042054~histone methyltransferase activity,…
ENSBTAG00000020570 PR/SET domain 8(PRDM8) Bos taurus GO:0006355~regulation of transcription, DNA-templated,GO:0014003~oligodendrocyte development, GO:0005634~nucleus, IPR001214:SET domain, KW-0175~Coiled coil, DOMAIN:SET,REGION:Disordered,
ENSBTAG00000008359 Peptidylprolyl isomerase (F1MUA4_BOVIN) Bos taurus GO:0061077~chaperone-mediated protein folding, GO:0003755~peptidyl-prolyl cis-trans isomerase activity, IPR001179:Peptidyl-prolyl cis-trans isomerase, FKBP-type, domain, KW-0732~Signal, DOMAIN:PPIase FKBP-type,
ENSBTAG00000050469 Protein kinase domain-containing protein (A0A3Q1LKV2_BOVIN) Bos taurus GO:0000226~microtubule cytoskeleton organization,GO:0035556~intracellular signal transduction, GO:0005737~cytoplasm, GO:0004674~protein serine/threonine kinase activity,GO:0005524~ATP binding,GO:0050321~tau-protein kinase activity, IPR000719:Protein kinase, catalytic domain,IPR008271:Serine/threonine-protein…
ENSBTAG00000052622 Protein kinase domain-containing protein (A0A3Q1LS68_BOVIN) Bos taurus GO:0000226~microtubule cytoskeleton organization,GO:0035556~intracellular signal transduction, GO:0005737~cytoplasm, GO:0004674~protein serine/threonine kinase activity,GO:0005524~ATP binding,GO:0050321~tau-protein kinase activity, IPR000719:Protein kinase, catalytic domain,IPR008271:Serine/threonine-protein…
ENSBTAG00000045683 Protocadherin gamma subfamily A, 5(PCDHGA5) Bos taurus GO:0007155~cell adhesion,GO:0007156~homophilic cell adhesion via plasma membrane adhesion molecules, GO:0005887~integral component of plasma membrane, GO:0005509~calcium ion binding, IPR002126:Cadherin,IPR013164:Cadherin, N-terminal,IPR015919:Cadherin-like,IPR020894:Cadherin conserved site, SM00112:CA, KW-0130~Cell adhesion…
ENSBTAG00000051394 Pyrin domain-containing protein (A0A3Q1LQZ2_BOVIN) Bos taurus IPR004020:DAPIN domain,IPR011029:Death-like domain, SM01289:SM01289, DOMAIN:Pyrin,
ENSBTAG00000016666 RAB11 binding and LisH domain, coiled-coil and HEAT repeat containing(RELCH) Bos taurus GO:0032367~intracellular cholesterol transport, GO:0005802~trans-Golgi network, IPR006594:LisH dimerisation motif,IPR011989:Armadillo-like helical,IPR016024:Armadillo-type fold,IPR021133:HEAT, type 2, SM00667:LisH, KW-0175~Coiled coil, COMPBIAS:Basic and acidic residues,DOMAIN:LisH,REGION:Di…
ENSBTAG00000012585 RAB3 GTPase activating non-catalytic protein subunit 2(RAB3GAP2) Bos taurus GO:0043087~regulation of GTPase activity,GO:0097051~establishment of protein localization to endoplasmic reticulum membrane,GO:1903061~positive regulation of protein lipidation,GO:1903373~positive regulation of endoplasmic reticulum tubular network organization,GO:2000786~positive regulation of autophag…
ENSBTAG00000019209 RAD1 checkpoint DNA exonuclease(RAD1) Bos taurus GO:0000077~DNA damage checkpoint,GO:0006281~DNA repair,GO:0051598~meiotic recombination checkpoint,GO:0071479~cellular response to ionizing radiation, GO:0005654~nucleoplasm,GO:0030896~checkpoint clamp complex, GO:0008408~3'-5' exonuclease activity, IPR003011:Cell cycle checkpoint protein, Rad1,IPR003021:Rad1/Rec1/Rad17, bta04218…
ENSBTAG00000002918 RAD51 recombinase(RAD51) Bos taurus GO:0000722~telomere maintenance via recombination,GO:0000724~double-strand break repair via homologous recombination,GO:0000730~DNA recombinase assembly,GO:0001932~regulation of protein phosphorylation,GO:0002769~natural killer cell inhibitory signaling pathway,GO:0006268~DNA unwinding involved in DNA replication,GO:0006281~DNA repair,GO:0006…
ENSBTAG00000000030 RAD52 motif containing 1(RDM1) Bos taurus GO:0005730~nucleolus,GO:0005829~cytosol, GO:0003723~RNA binding, IPR000504:RNA recognition motif domain,IPR012677:Nucleotide-binding, alpha-beta plait, KW-0539~Nucleus,KW-0963~Cytoplasm, DOMAIN:RRM,
ENSBTAG00000016243 RB transcriptional corepressor like 2(RBL2) Bos taurus GO:0006357~regulation of transcription from RNA polymerase II promoter,GO:0007049~cell cycle,GO:0010629~negative regulation of gene expression,GO:0030154~cell differentiation,GO:0043550~regulation of lipid kinase activity,GO:0051302~regulation of cell division,GO:0051726~regulation of cell cycle,GO:2000134~negative regulati…
ENSBTAG00000004863 RIC3 acetylcholine receptor chaperone(RIC3) Bos taurus GO:0007271~synaptic transmission, cholinergic,GO:0034394~protein localization to cell surface,GO:0034622~cellular macromolecular complex assembly,GO:2000010~positive regulation of protein localization to cell surface, GO:0005783~endoplasmic reticulum,GO:0016021~integral component of membrane,GO:0043005~neuron projection,GO:…
ENSBTAG00000047076 RING-type domain-containing protein (G3MWN3_BOVIN) Bos taurus GO:0046872~metal ion binding, IPR001841:Zinc finger, RING-type,IPR013083:Zinc finger, RING/FYVE/PHD-type, SM00184:RING, KW-0479~Metal-binding,KW-0862~Zinc, DOMAIN:RING-type,
ENSBTAG00000012555 RNA binding motif protein 15(RBM15) Bos taurus GO:0000122~negative regulation of transcription from RNA polymerase II promoter,GO:0000381~regulation of alternative mRNA splicing, via spliceosome,GO:0000398~mRNA splicing, via spliceosome,GO:0001510~RNA methylation,GO:0001569~branching involved in blood vessel morphogenesis,GO:0007221~positive regulation of transcription of Notch…
ENSBTAG00000016367 RNA binding motif protein 18(RBM18) Bos taurus GO:0005654~nucleoplasm,GO:0005829~cytosol,GO:0045171~intercellular bridge, GO:0003723~RNA binding, IPR000504:RNA recognition motif domain,IPR012677:Nucleotide-binding, alpha-beta plait, SM00360:RRM, KW-0694~RNA-binding, DOMAIN:RRM,REGION:Disordered,
ENSBTAG00000023891 RNA binding motif protein 20(RBM20) Bos taurus GO:0007507~heart development,GO:0033120~positive regulation of RNA splicing,GO:0043484~regulation of RNA splicing, GO:0005634~nucleus, GO:0003729~mRNA binding,GO:0008270~zinc ion binding, IPR000504:RNA recognition motif domain,IPR000690:Zinc finger, C2H2-type matrin,IPR003604:Zinc finger, U1-type,IPR012677:Nucleotide-binding, alpha…
ENSBTAG00000003949 RNA binding motif protein 39(RBM39) Bos taurus GO:0006397~mRNA processing,GO:0048024~regulation of mRNA splicing, via spliceosome, GO:0005634~nucleus,GO:0016607~nuclear speck,GO:0032991~macromolecular complex,GO:0034451~centriolar satellite, GO:0003723~RNA binding,GO:0050733~RS domain binding, IPR000504:RNA recognition motif domain,IPR003954:RNA recognition motif domain, eukary…
ENSBTAG00000002356 RNA binding motif protein 47(RBM47) Bos taurus GO:0002244~hematopoietic progenitor cell differentiation,GO:0016554~cytidine to uridine editing, GO:0005634~nucleus, GO:0003723~RNA binding,GO:0003729~mRNA binding, IPR000504:RNA recognition motif domain,IPR006535:HnRNP R/Q splicing factor,IPR012677:Nucleotide-binding, alpha-beta plait, SM00360:RRM, KW-0539~Nucleus, KW-0677~Repeat,…
ENSBTAG00000022539 RNA polymerase II, I and III subunit K(POLR2K) Bos taurus GO:0006366~transcription from RNA polymerase II promoter, GO:0005634~nucleus,GO:0005665~DNA-directed RNA polymerase II, core complex,GO:0005666~DNA-directed RNA polymerase III complex,GO:0005736~DNA-directed RNA polymerase I complex, GO:0003677~DNA binding,GO:0003899~DNA-directed 5'-3' RNA polymerase activity,GO:0008270~…
ENSBTAG00000048516 RNA-directed DNA polymerase (A0A3Q1NBB8_BOVIN) Bos taurus GO:0015074~DNA integration,GO:0016032~viral process, GO:0003964~RNA-directed DNA polymerase activity,GO:0004523~RNA-DNA hybrid ribonuclease activity,GO:0008270~zinc ion binding,GO:0035613~RNA stem-loop binding, IPR000721:Retroviral nucleocapsid protein Gag,IPR001037:Integrase, C-terminal, retroviral,IPR001584:Integrase, …
ENSBTAG00000053798 RNA-directed DNA polymerase (A0A3Q1ND46_BOVIN) Bos taurus IPR000477:Reverse transcriptase, KW-0175~Coiled coil, DOMAIN:Reverse transcriptase,
ENSBTAG00000048835 SERPIN domain-containing protein (F1MMS7_BOVIN) Bos taurus GO:0010951~negative regulation of endopeptidase activity, GO:0005615~extracellular space, GO:0004867~serine-type endopeptidase inhibitor activity, IPR000215:Serpin family,IPR023795:Protease inhibitor I4, serpin, conserved site,IPR023796:Serpin domain, SM00093:SERPIN, DOMAIN:SERPIN,
ENSBTAG00000033180 SET and MYND domain containing 3(SMYD3) Bos taurus GO:0006334~nucleosome assembly,GO:0006469~negative regulation of protein kinase activity,GO:0014904~myotube cell development,GO:0033138~positive regulation of peptidyl-serine phosphorylation,GO:0034968~histone lysine methylation,GO:0045184~establishment of protein localization,GO:0045944~positive regulation of transcription fro…
ENSBTAG00000018682 SET domain containing 4(SETD4) Bos taurus GO:0018023~peptidyl-lysine trimethylation,GO:0018026~peptidyl-lysine monomethylation,GO:0032755~positive regulation of interleukin-6 production,GO:0032760~positive regulation of tumor necrosis factor production,GO:0034773~histone H4-K20 trimethylation,GO:0044648~histone H3-K4 dimethylation,GO:0050729~positive regulation of inflammatory …
ENSBTAG00000017775 SHH signaling and ciliogenesis regulator SDCCAG8(SDCCAG8) Bos taurus GO:0001764~neuron migration,GO:0007098~centrosome cycle,GO:0030010~establishment of cell polarity,GO:0031023~microtubule organizing center organization,GO:0035148~tube formation,GO:1902017~regulation of cilium assembly, GO:0005737~cytoplasm,GO:0005813~centrosome,GO:0005814~centriole,GO:0005911~cell-cell juncti…
ENSBTAG00000021328 SPHK1 interactor, AKAP domain containing(SPHKAP) Bos taurus GO:0005737~cytoplasm,GO:0005739~mitochondrion, GO:0051018~protein kinase A binding, IPR008382:SPHK1-interactor/A-kinase anchor 110kDa,IPR018292:A-kinase anchor 110kDa, C-terminal, KW-0175~Coiled coil, COMPBIAS:Basic and acidic residues,COMPBIAS:Polar residues,DOMAIN:AKAP_110,REGION:Disordered,
ENSBTAG00000002175 SRSF protein kinase 2(SRPK2) Bos taurus GO:0000245~spliceosomal complex assembly,GO:0008284~positive regulation of cell proliferation,GO:0018105~peptidyl-serine phosphorylation,GO:0035556~intracellular signal transduction,GO:0045070~positive regulation of viral genome replication,GO:0045071~negative regulation of viral genome replication,GO:0050684~regulation of mRNA processing…
ENSBTAG00000019298 STE20 related adaptor beta(STRADB) Bos taurus GO:0000902~cell morphogenesis,GO:0006611~protein export from nucleus,GO:0007254~JNK cascade,GO:0032147~activation of protein kinase activity,GO:2001240~negative regulation of extrinsic apoptotic signaling pathway in absence of ligand, GO:0005634~nucleus,GO:0005829~cytosol,GO:0016235~aggresome, GO:0004672~protein kinase activity,GO:0…
ENSBTAG00000054833 T cell receptor alpha variable 22-like(LOC104973090) Bos taurus IPR003599:Immunoglobulin subtype,IPR007110:Immunoglobulin-like domain,IPR013106:Immunoglobulin V-set,IPR013783:Immunoglobulin-like fold, SM00406:IGv,SM00409:IG, KW-0732~Signal, KW-0325~Glycoprotein, DOMAIN:Ig-like,
ENSBTAG00000051786 T cell receptor beta variable 5-1(LOC100297263) Bos taurus GO:0007166~cell surface receptor signaling pathway, GO:0005886~plasma membrane, IPR003599:Immunoglobulin subtype,IPR007110:Immunoglobulin-like domain,IPR013106:Immunoglobulin V-set,IPR013783:Immunoglobulin-like fold, SM00406:IGv,SM00409:IG, KW-0732~Signal, KW-0325~Glycoprotein, DOMAIN:Ig-like,REGION:Disordered,
ENSBTAG00000014278 T-box transcription factor 2(TBX2) Bos taurus GO:0001708~cell fate specification,GO:0003148~outflow tract septum morphogenesis,GO:0003256~regulation of transcription from RNA polymerase II promoter involved in myocardial precursor cell differentiation,GO:0003272~endocardial cushion formation,GO:0006357~regulation of transcription from RNA polymerase II promoter,GO:0007219~Notch…
ENSBTAG00000011384 T-box transcription factor 5(TBX5) Bos taurus GO:0001708~cell fate specification,GO:0002009~morphogenesis of an epithelium,GO:0003167~atrioventricular bundle cell differentiation,GO:0003181~atrioventricular valve morphogenesis,GO:0003197~endocardial cushion development,GO:0003218~cardiac left ventricle formation,GO:0003281~ventricular septum development,GO:0006357~regulation of…
ENSBTAG00000013483 TATA-box binding protein associated factor, RNA polymerase I subunit A(TAF1A) Bos taurus GO:0006360~transcription from RNA polymerase I promoter, GO:0000120~RNA polymerase I transcription factor complex,GO:0005654~nucleoplasm,GO:0015630~microtubule cytoskeleton, IPR016629:RNA polymerase I, subunit A (TATA-binding protein-associated factor), PIRSF015161:RNA polymerase I, subunit…
ENSBTAG00000019073 TNF receptor associated factor 7(TRAF7) Bos taurus GO:0000185~activation of MAPKKK activity,GO:0006915~apoptotic process,GO:0070372~regulation of ERK1 and ERK2 cascade,GO:2001235~positive regulation of apoptotic signaling pathway, GO:0000151~ubiquitin ligase complex,GO:0005886~plasma membrane,GO:0043231~intracellular membrane-bounded organelle, GO:0004842~ubiquitin-protein tran…
ENSBTAG00000000418 TOX high mobility group box family member 3(TOX3) Bos taurus GO:0006357~regulation of transcription from RNA polymerase II promoter,GO:0043524~negative regulation of neuron apoptotic process,GO:0045944~positive regulation of transcription from RNA polymerase II promoter, GO:0005634~nucleus,GO:0005654~nucleoplasm,GO:0005829~cytosol, GO:0003677~DNA binding,GO:0003713~transcriptio…
ENSBTAG00000036061 UL16-binding protein 3-like(LOC100336795) Bos taurus GO:0005615~extracellular space,GO:0009897~external side of plasma membrane,GO:0016021~integral component of membrane, IPR011161:MHC class I-like antigen recognition,IPR011162:MHC classes I/II-like antigen recognition protein, bta04650:Natural killer cell mediated cytotoxicity, KW-0472~Membrane, KW-0732~Signal,KW-0812~Transmem…
ENSBTAG00000048553 UPF0061 protein azo1574(LOC100297097) Bos taurus GO:0005524~ATP binding,GO:0016779~nucleotidyltransferase activity,GO:0046872~metal ion binding, IPR003846:Uncharacterised protein family UPF0061, KW-0067~ATP-binding,KW-0460~Magnesium,KW-0479~Metal-binding,KW-0547~Nucleotide-binding, KW-0548~Nucleotidyltransferase,KW-0808~Transferase,
ENSBTAG00000052820 Uncharacterized protein (A0A3Q1LL28_BOVIN) Bos taurus GO:0002250~adaptive immune response,GO:0002286~T cell activation involved in immune response,GO:0002323~natural killer cell activation involved in immune response,GO:0006959~humoral immune response,GO:0019221~cytokine-mediated signaling pathway,GO:0030183~B cell differentiation,GO:0033141~positive regulation of peptidyl-seri…
ENSBTAG00000049183 Uncharacterized protein (A0A3Q1LLC5_BOVIN) Bos taurus REGION:Disordered,
ENSBTAG00000050327 Uncharacterized protein (A0A3Q1LRZ0_BOVIN) Bos taurus GO:0006357~regulation of transcription from RNA polymerase II promoter, GO:0005634~nucleus, GO:0000977~RNA polymerase II regulatory region sequence-specific DNA binding,GO:0000981~RNA polymerase II transcription factor activity, sequence-specific DNA binding, IPR001356:Homeodomain,IPR009057:Homeodomain-like, SM00389:HOX, COM…
ENSBTAG00000053294 Uncharacterized protein (A0A3Q1LTT5_BOVIN) Bos taurus GO:0007155~cell adhesion,GO:0007156~homophilic cell adhesion via plasma membrane adhesion molecules, GO:0005887~integral component of plasma membrane, GO:0005509~calcium ion binding, IPR002126:Cadherin,IPR015919:Cadherin-like,IPR020894:Cadherin conserved site, SM00112:CA, KW-0472~Membrane,KW-1003~Cell membrane, KW-0677~Repea…
ENSBTAG00000049205 Uncharacterized protein (A0A3Q1LV15_BOVIN) Bos taurus GO:0006357~regulation of transcription from RNA polymerase II promoter, GO:0005634~nucleus, GO:0000977~RNA polymerase II regulatory region sequence-specific DNA binding,GO:0000981~RNA polymerase II transcription factor activity, sequence-specific DNA binding, IPR000047:Helix-turn-helix motif,IPR001356:Homeodomain,IPR009057:H…
ENSBTAG00000051803 Uncharacterized protein (A0A3Q1LYZ9_BOVIN) Bos taurus REGION:Disordered,
ENSBTAG00000052807, ENSBTAG00000049205, ENSBTAG00000051286, ENSBTAG00000052137, ENSBTAG00000053122 Uncharacterized protein (A0A3Q1M5C2_BOVIN) Bos taurus GO:0005634~nucleus, GO:0003677~DNA binding, IPR001356:Homeodomain,IPR009057:Homeodomain-like, SM00389:HOX, COMPBIAS:Basic and acidic residues,DNA_BIND:Homeobox,DOMAIN:Homeobox,REGION:Disordered,
ENSBTAG00000051425 Uncharacterized protein (A0A3Q1M7U6_BOVIN) Bos taurus IPR013783:Immunoglobulin-like fold, KW-0732~Signal,
ENSBTAG00000009197 Uncharacterized protein (A0A3Q1M8D3_BOVIN) Bos taurus GO:0008270~zinc ion binding, IPR000315:Zinc finger, B-box,IPR001841:Zinc finger, RING-type,IPR001870:B30.2/SPRY domain,IPR003877:SPla/RYanodine receptor SPRY,IPR003879:Butyrophylin-like,IPR013083:Zinc finger, RING/FYVE/PHD-type,IPR013320:Concanavalin A-like lectin/glucanase, subgroup,IPR017907:Zinc finger, RING-type, conserv…
ENSBTAG00000049371 Uncharacterized protein (A0A3Q1MAE8_BOVIN) Bos taurus GO:0034341~response to interferon-gamma,GO:0035455~response to interferon-alpha,GO:0035456~response to interferon-beta,GO:0045071~negative regulation of viral genome replication,GO:0046597~negative regulation of viral entry into host cell,GO:0051607~defense response to virus,GO:0060337~type I interferon signaling pathway, GO…
ENSBTAG00000051364 Uncharacterized protein (A0A3Q1MFG1_BOVIN) Bos taurus COMPBIAS:Pro residues,REGION:Disordered,
ENSBTAG00000048894 Uncharacterized protein (A0A3Q1MGF8_BOVIN) Bos taurus REGION:Disordered,
ENSBTAG00000054977 Uncharacterized protein (A0A3Q1MI30_BOVIN) Bos taurus GO:0010468~regulation of gene expression,GO:0016567~protein ubiquitination,GO:0045087~innate immune response, GO:0005737~cytoplasm, GO:0008270~zinc ion binding,GO:0061630~ubiquitin protein ligase activity, IPR000315:Zinc finger, B-box,IPR001841:Zinc finger, RING-type,IPR001870:B30.2/SPRY domain,IPR003877:SPla/RYanodine recep…
ENSBTAG00000053765 Uncharacterized protein (A0A3Q1MP95_BOVIN) Bos taurus GO:0005737~cytoplasm,
ENSBTAG00000054977 Uncharacterized protein (A0A3Q1MWE5_BOVIN) Bos taurus GO:0008270~zinc ion binding, IPR000315:Zinc finger, B-box,IPR001841:Zinc finger, RING-type,IPR001870:B30.2/SPRY domain,IPR003877:SPla/RYanodine receptor SPRY,IPR003879:Butyrophylin-like,IPR013083:Zinc finger, RING/FYVE/PHD-type,IPR013320:Concanavalin A-like lectin/glucanase, subgroup,IPR017907:Zinc finger, RING-type, conserv…
ENSBTAG00000052807, ENSBTAG00000051286, ENSBTAG00000053122 Uncharacterized protein (A0A3Q1MWQ9_BOVIN) Bos taurus GO:0005634~nucleus, GO:0003677~DNA binding, IPR001356:Homeodomain,IPR009057:Homeodomain-like, SM00389:HOX, COMPBIAS:Basic and acidic residues,DNA_BIND:Homeobox,DOMAIN:Homeobox,REGION:Disordered,
ENSBTAG00000053953 Uncharacterized protein (A0A3Q1N0A2_BOVIN) Bos taurus IPR021743:Keratin-associated matrix,
ENSBTAG00000048451 Uncharacterized protein (A0A3Q1N2I6_BOVIN) Bos taurus COMPBIAS:Basic residues,REGION:Disordered,
ENSBTAG00000050834 Uncharacterized protein (A0A3Q1NK08_BOVIN) Bos taurus GO:0045920~negative regulation of exocytosis, GO:0016020~membrane, IPR003599:Immunoglobulin subtype,IPR007110:Immunoglobulin-like domain,IPR013783:Immunoglobulin-like fold,IPR015621:Interleukin-1 receptor family, SM00409:IG, KW-0732~Signal, DOMAIN:Ig-like,
ENSBTAG00000009197 Uncharacterized protein (E1BKE6_BOVIN) Bos taurus GO:0010468~regulation of gene expression,GO:0016567~protein ubiquitination,GO:0045087~innate immune response, GO:0005737~cytoplasm, GO:0008270~zinc ion binding,GO:0061630~ubiquitin protein ligase activity, IPR000315:Zinc finger, B-box,IPR001841:Zinc finger, RING-type,IPR001870:B30.2/SPRY domain,IPR003877:SPla/RYanodine receptor …
ENSBTAG00000022931 Uncharacterized protein (F1MCR1_BOVIN) Bos taurus IPR002110:Ankyrin repeat,IPR020683:Ankyrin repeat-containing domain, SM00248:ANK, KW-0040~ANK repeat, REGION:Disordered,REPEAT:ANK,
ENSBTAG00000006648 Uncharacterized protein (F1MCW1_BOVIN) Bos taurus GO:0010629~negative regulation of gene expression, GO:0005576~extracellular region,
ENSBTAG00000030910 Uncharacterized protein (F1MLR1_BOVIN) Bos taurus GO:0002456~T cell mediated immunity,GO:0045959~negative regulation of complement activation, classical pathway, GO:0005886~plasma membrane, IPR000436:Sushi/SCR/CCP, SM00032:CCP, KW-0768~Sushi, DOMAIN:Sushi,
ENSBTAG00000040063 Uncharacterized protein (F1MUP0_BOVIN) Bos taurus GO:0006357~regulation of transcription from RNA polymerase II promoter, GO:0005634~nucleus, GO:0000978~RNA polymerase II core promoter proximal region sequence-specific DNA binding,GO:0000981~RNA polymerase II transcription factor activity, sequence-specific DNA binding, IPR013087:Zinc finger C2H2-type/integrase DNA-binding doma…
ENSBTAG00000017012 Uncharacterized protein (F1MX15_BOVIN) Bos taurus IPR002110:Ankyrin repeat,IPR020683:Ankyrin repeat-containing domain, SM00248:ANK, KW-0040~ANK repeat, REGION:Disordered,REPEAT:ANK,
ENSBTAG00000011638 Uncharacterized protein (F1N7E4_BOVIN) Bos taurus GO:0002084~protein depalmitoylation, GO:0005886~plasma membrane,GO:0010008~endosome membrane, GO:0008474~palmitoyl-(protein) hydrolase activity,
ENSBTAG00000025908 Uncharacterized protein (F1N7I0_BOVIN) Bos taurus GO:0006334~nucleosome assembly, GO:0000785~chromatin,GO:0005634~nucleus, GO:0003682~chromatin binding,GO:0042393~histone binding, IPR002164:Nucleosome assembly protein (NAP), COMPBIAS:Polar residues,REGION:Disordered,
ENSBTAG00000011052 Uncharacterized protein (F1N7R8_BOVIN) Bos taurus GO:0006357~regulation of transcription from RNA polymerase II promoter, GO:0005634~nucleus, GO:0000978~RNA polymerase II core promoter proximal region sequence-specific DNA binding,GO:0001228~transcriptional activator activity, RNA polymerase II transcription regulatory region sequence-specific binding,GO:0046872~metal ion bindi…
ENSBTAG00000045799 Uncharacterized protein (G3MWN9_BOVIN) Bos taurus GO:0030322~stabilization of membrane potential,GO:0071805~potassium ion transmembrane transport, GO:0005887~integral component of plasma membrane, GO:0022841~potassium ion leak channel activity, IPR003280:Two pore domain potassium channel,IPR013099:Ion transport 2, KW-0406~Ion transport,KW-0813~Transport, KW-0472~Membrane, KW-04…
ENSBTAG00000022931 Uncharacterized protein (G3X6G1_BOVIN) Bos taurus IPR002110:Ankyrin repeat,IPR020683:Ankyrin repeat-containing domain, SM00248:ANK, KW-0040~ANK repeat, REGION:Disordered,REPEAT:ANK,
ENSBTAG00000003625 V-set and transmembrane domain containing 2A(VSTM2A) Bos taurus GO:0016021~integral component of membrane, IPR003599:Immunoglobulin subtype,IPR007110:Immunoglobulin-like domain,IPR013106:Immunoglobulin V-set,IPR013783:Immunoglobulin-like fold, SM00409:IG, KW-0732~Signal, KW-0325~Glycoprotein, COMPBIAS:Polar residues,DOMAIN:Ig-like,REGION:Disordered,
ENSBTAG00000001320 VPS16 core subunit of CORVET and HOPS complexes(VPS16) Bos taurus GO:0006886~intracellular protein transport,GO:0007033~vacuole organization,GO:0008333~endosome to lysosome transport,GO:0016197~endosomal transport,GO:0042144~vacuole fusion, non-autophagic,GO:0097352~autophagosome maturation, GO:0005765~lysosomal membrane,GO:0005768~endosome,GO:0005769~early endosome,GO:0005776~…
ENSBTAG00000046864 Vomeronasal type-1 receptor (A0A3Q1MNR7_BOVIN) Bos taurus GO:0019236~response to pheromone, GO:0005886~plasma membrane,GO:0016021~integral component of membrane, GO:0016503~pheromone receptor activity, IPR004072:Vomeronasal receptor, type 1,IPR017452:GPCR, rhodopsin-like, 7TM, KW-0472~Membrane,KW-1003~Cell membrane, KW-0297~G-protein coupled receptor,KW-0675~Receptor,KW-0807~Tr…
ENSBTAG00000021540 WD repeat domain 11(WDR11) Bos taurus GO:0006886~intracellular protein transport,GO:0099041~vesicle tethering to Golgi, GO:0005634~nucleus,GO:0005737~cytoplasm,GO:0005802~trans-Golgi network,GO:0005829~cytosol,GO:0031410~cytoplasmic vesicle,GO:0036064~ciliary basal body, IPR001680:WD40 repeat,IPR015943:WD40/YVTN repeat-like-containing domain,IPR019775:WD40 repeat, conserved sit…
ENSBTAG00000014751 Zic family member 1(ZIC1) Bos taurus Transcription / Cell division and chromosome partitioning, GO:0006357~regulation of transcription from RNA polymerase II promoter,GO:0007417~central nervous system development,GO:0007420~brain development, GO:0005634~nucleus,GO:0005654~nucleoplasm, GO:0000978~RNA polymerase II core promoter proximal region sequence-specific DNA binding,GO:00…
ENSBTAG00000016730 acidic nuclear phosphoprotein 32 family member E(ANP32E) Bos taurus GO:0042981~regulation of apoptotic process,GO:0043486~histone exchange, GO:0000812~Swr1 complex,GO:0031410~cytoplasmic vesicle, GO:0019212~phosphatase inhibitor activity,GO:0042393~histone binding, IPR001611:Leucine-rich repeat, COMPBIAS:Acidic residues,REGION:Disordered,
ENSBTAG00000001164 acyl-CoA dehydrogenase family, member 10(ACAD10) Bos taurus General function prediction only,Lipid metabolism, GO:0005739~mitochondrion, GO:0016627~oxidoreductase activity, acting on the CH-CH group of donors,GO:0016787~hydrolase activity,GO:0050660~flavin adenine dinucleotide binding, IPR002575:Aminoglycoside phosphotransferase,IPR006091:Acyl-CoA oxidase/dehydrogenase, central…
ENSBTAG00000003941 adaptor related protein complex 1 associated regulatory protein(AP1AR) Bos taurus GO:0001920~negative regulation of receptor recycling,GO:0034315~regulation of Arp2/3 complex-mediated actin nucleation,GO:0034613~cellular protein localization,GO:0048203~vesicle targeting, trans-Golgi to endosome,GO:1900025~negative regulation of substrate adhesion-dependent cell spreading,GO:200…
ENSBTAG00000046191 adenosine deaminase domain containing 1(ADAD1) Bos taurus GO:0006382~adenosine to inosine editing,GO:0006396~RNA processing, GO:0005730~nucleolus,GO:0005737~cytoplasm, GO:0003723~RNA binding,GO:0003725~double-stranded RNA binding,GO:0003726~double-stranded RNA adenosine deaminase activity,GO:0008251~tRNA-specific adenosine deaminase activity, IPR014720:Double-stranded RNA-bindi…
ENSBTAG00000016629 adenylate cyclase 9(ADCY9) Bos taurus GO:0001701~in utero embryonic development,GO:0006171~cAMP biosynthetic process,GO:0007189~adenylate cyclase-activating G-protein coupled receptor signaling pathway,GO:0035556~intracellular signal transduction,GO:0071880~adenylate cyclase-activating adrenergic receptor signaling pathway, GO:0005887~integral component of plasma membrane, GO:0…
ENSBTAG00000026148 adhesion G protein-coupled receptor E2-like(LOC100300051) Bos taurus GO:0007166~cell surface receptor signaling pathway,GO:0007189~adenylate cyclase-activating G-protein coupled receptor signaling pathway, GO:0005887~integral component of plasma membrane, GO:0004930~G-protein coupled receptor activity,GO:0005509~calcium ion binding, IPR000152:EGF-type aspartate/asparagine hydro…
ENSBTAG00000014365 adhesion G protein-coupled receptor E2-like(LOC112447333) Bos taurus GO:0007166~cell surface receptor signaling pathway,GO:0007189~adenylate cyclase-activating G-protein coupled receptor signaling pathway, GO:0005887~integral component of plasma membrane,GO:0016021~integral component of membrane, GO:0004930~G-protein coupled receptor activity, IPR000203:GPS domain,IPR000832:GPC…
ENSBTAG00000009125 aldehyde dehydrogenase 1 family member A3(ALDH1A3) Bos taurus GO:0002072~optic cup morphogenesis involved in camera-type eye development,GO:0002138~retinoic acid biosynthetic process,GO:0007626~locomotory behavior,GO:0021768~nucleus accumbens development,GO:0042472~inner ear morphogenesis,GO:0042574~retinal metabolic process,GO:0043065~positive regulation of apoptotic process,G…
ENSBTAG00000033339 ankyrin repeat and LEM domain containing 2(ANKLE2) Bos taurus GO:0007049~cell cycle,GO:0007084~mitotic nuclear envelope reassembly,GO:0007417~central nervous system development,GO:0035307~positive regulation of protein dephosphorylation,GO:0042326~negative regulation of phosphorylation,GO:0043066~negative regulation of apoptotic process,GO:0051301~cell division, GO:0005783~endo…
ENSBTAG00000004145 anoctamin 4(ANO4) Bos taurus GO:0006821~chloride transport,GO:0055085~transmembrane transport,GO:0061588~calcium activated phospholipid scrambling,GO:1902476~chloride transmembrane transport, GO:0005886~plasma membrane,GO:0016021~integral component of membrane, GO:0005229~intracellular calcium activated chloride channel activity,GO:0005254~chloride channel activity,GO:0046983~p…
ENSBTAG00000020548 antizyme inhibitor 2(AZIN2) Bos taurus GO:0006596~polyamine biosynthetic process,GO:0033387~putrescine biosynthetic process from ornithine,GO:0042177~negative regulation of protein catabolic process,GO:0043085~positive regulation of catalytic activity,GO:0098629~trans-Golgi network membrane organization,GO:1902269~positive regulation of polyamine transmembrane transport, GO:000…
ENSBTAG00000049297 apolipoprotein L3(LOC786352) Bos taurus Cytoskeleton, GO:0006869~lipid transport,GO:0042157~lipoprotein metabolic process, GO:0005576~extracellular region, GO:0008289~lipid binding, IPR008405:Apolipoprotein L, KW-0175~Coiled coil,
ENSBTAG00000018401 aprataxin and PNKP like factor(APLF) Bos taurus GO:0000012~single strand break repair,GO:0006302~double-strand break repair,GO:0006303~double-strand break repair via nonhomologous end joining,GO:0006974~cellular response to DNA damage stimulus,GO:0051106~positive regulation of DNA ligation,GO:0090305~nucleic acid phosphodiester bond hydrolysis, GO:0005634~nucleus,GO:0005654~nuc…
ENSBTAG00000013947 aprataxin(APTX) Bos taurus GO:0000012~single strand break repair,GO:0006281~DNA repair,GO:0006302~double-strand break repair,GO:0031647~regulation of protein stability,GO:0042542~response to hydrogen peroxide,GO:0090305~nucleic acid phosphodiester bond hydrolysis, GO:0000785~chromatin,GO:0005634~nucleus,GO:0005654~nucleoplasm,GO:0005730~nucleolus, GO:0003677~DNA binding,GO:0003…
ENSBTAG00000012478 arachidonate lipoxygenase 3(ALOXE3) Bos taurus GO:0019369~arachidonic acid metabolic process,GO:0019372~lipoxygenase pathway,GO:0035357~peroxisome proliferator activated receptor signaling pathway,GO:0043651~linoleic acid metabolic process,GO:0045444~fat cell differentiation,GO:0046513~ceramide biosynthetic process,GO:0051122~hepoxilin biosynthetic process,GO:0061436~establishm…
ENSBTAG00000020178 arylsulfatase family member K(ARSK) Bos taurus Inorganic ion transport and metabolism, GO:0005576~extracellular region,GO:0005764~lysosome, GO:0004065~arylsulfatase activity,GO:0008484~sulfuric ester hydrolase activity,GO:0015024~glucuronate-2-sulfatase activity,GO:0046872~metal ion binding, IPR000917:Sulfatase,IPR017850:Alkaline-phosphatase-like, core domain, KW-0458~Lysosome,…
ENSBTAG00000003222 asparagine synthetase (glutamine-hydrolyzing)(ASNS) Bos taurus GO:0006529~asparagine biosynthetic process,GO:0006541~glutamine metabolic process,GO:0042149~cellular response to glucose starvation,GO:0043066~negative regulation of apoptotic process,GO:0045931~positive regulation of mitotic cell cycle,GO:0070981~L-asparagine biosynthetic process, GO:0005829~cytosol, GO:0004066~as…
ENSBTAG00000017525 autophagy related 12(ATG12) Bos taurus GO:0000045~autophagosome assembly,GO:0000422~mitophagy,GO:0006501~C-terminal protein lipidation,GO:0044804~nucleophagy,GO:0045087~innate immune response, GO:0005776~autophagosome,GO:0034045~pre-autophagosomal structure membrane,GO:0034274~Atg12-Atg5-Atg16 complex, IPR007242:Ubiquitin-like protein Atg12, bta04068:FoxO signaling pathway,bta0…
ENSBTAG00000021519 calcium modulating ligand(CAMLG) Bos taurus GO:0031397~negative regulation of protein ubiquitination,GO:0032435~negative regulation of proteasomal ubiquitin-dependent protein catabolic process,GO:0050821~protein stabilization,GO:0071816~tail-anchored membrane protein insertion into ER membrane, GO:0016020~membrane,GO:0030176~integral component of endoplasmic reticulum membrane,…
ENSBTAG00000054523 cannabinoid receptor 1(CNR1) Bos taurus GO:0007188~adenylate cyclase-modulating G-protein coupled receptor signaling pathway,GO:0007413~axonal fasciculation,GO:0042593~glucose homeostasis,GO:0098921~retrograde trans-synaptic signaling by endocannabinoid,GO:0099553~trans-synaptic signaling by endocannabinoid, modulating synaptic transmission, GO:0005741~mitochondrial outer membr…
ENSBTAG00000034681 carbonic anhydrase 10(CA10) Bos taurus GO:0006730~one-carbon metabolic process, GO:0004089~carbonate dehydratase activity,GO:0008270~zinc ion binding,GO:0016836~hydro-lyase activity, IPR001148:Alpha carbonic anhydrase,IPR018423:Carbonic anhydrase-related protein, CA-X,IPR023561:Carbonic anhydrase, alpha-class, SM01057:SM01057, DOMAIN:Alpha-carbonic anhydrase,
ENSBTAG00000012909 cellular retinoic acid binding protein 1(CRABP1) Bos taurus GO:0034653~retinoic acid catabolic process, GO:0005737~cytoplasm,GO:0032991~macromolecular complex, GO:0001972~retinoic acid binding,GO:0016918~retinal binding,GO:0019841~retinol binding,GO:0042802~identical protein binding, IPR000463:Cytosolic fatty-acid binding,IPR000566:Lipocalin/cytosolic fatty-acid binding protein…
ENSBTAG00000003960 centriolar coiled-coil protein 110(CCP110) Bos taurus GO:0007099~centriole replication,GO:0032053~ciliary basal body organization,GO:0032465~regulation of cytokinesis,GO:0045724~positive regulation of cilium assembly,GO:1902018~negative regulation of cilium assembly,GO:1903723~negative regulation of centriole elongation, GO:0005813~centrosome,GO:0005814~centriole,GO:0032991~mac…
ENSBTAG00000038745 charged multivesicular body protein 6(CHMP6) Bos taurus GO:0006900~membrane budding,GO:0006997~nucleus organization,GO:0007080~mitotic metaphase plate congression,GO:0007175~negative regulation of epidermal growth factor-activated receptor activity,GO:0032511~late endosome to vacuole transport via multivesicular body sorting pathway,GO:0039702~viral budding via host ESCRT compl…
ENSBTAG00000004956 checkpoint kinase 2(CHEK2) Bos taurus GO:0000086~G2/M transition of mitotic cell cycle,GO:0006302~double-strand break repair,GO:0006975~DNA damage induced protein phosphorylation,GO:0008630~intrinsic apoptotic signaling pathway in response to DNA damage,GO:0031573~intra-S DNA damage checkpoint,GO:0042176~regulation of protein catabolic process,GO:0042770~signal transduction in …
ENSBTAG00000017129 chloride channel CLIC like 1(CLCC1) Bos taurus GO:0006821~chloride transport, GO:0000139~Golgi membrane,GO:0005783~endoplasmic reticulum,GO:0005789~endoplasmic reticulum membrane,GO:0031965~nuclear membrane,GO:0034707~chloride channel complex,GO:0044233~ER-mitochondrion membrane contact site, GO:0005254~chloride channel activity, IPR009231:Chloride channel CLIC-like, KW-0406~Io…
ENSBTAG00000049437 chromobox 3(CBX3) Bos taurus GO:0045892~negative regulation of transcription, DNA-templated, GO:0000779~condensed chromosome, centromeric region,GO:0000791~euchromatin,GO:0000792~heterochromatin,GO:0005635~nuclear envelope,GO:0005721~pericentric heterochromatin,GO:0005819~spindle, GO:0019904~protein domain specific binding, IPR000953:Chromo domain/shadow,IPR008251:Chromo shadow…
ENSBTAG00000043993 chromosome 1 C21orf62 homolog(C1H21orf62) Bos taurus KW-0732~Signal, REGION:Disordered,
ENSBTAG00000023249 chromosome 13 open reading frame, human C20orf30 pseudogene(LOC785480) Bos taurus GO:0005769~early endosome,GO:0005776~autophagosome,GO:0005794~Golgi apparatus,GO:0008021~synaptic vesicle,GO:0016021~integral component of membrane,GO:0055037~recycling endosome, IPR008590:Protein of unknown function DUF872, transmembrane, KW-0333~Golgi apparatus,KW-0472~Membrane, KW-0812~Transmem…
ENSBTAG00000053468 chromosome 20 open reading frame 106 homolog(LOC786597) Bos taurus GO:0016021~integral component of membrane, KW-0472~Membrane, KW-0175~Coiled coil,KW-0812~Transmembrane,KW-1133~Transmembrane helix, TRANSMEM:Helical,
ENSBTAG00000003925 chromosome 9 C6orf120 homolog(C9H6orf120) Bos taurus GO:0006915~apoptotic process, GO:0005576~extracellular region, KW-0053~Apoptosis, KW-0964~Secreted, KW-0732~Signal, KW-0325~Glycoprotein, CARBOHYD:N-linked (GlcNAc...) asparagine,
ENSBTAG00000039820 claudin 8(CLDN8) Bos taurus GO:0007155~cell adhesion,GO:0070830~bicellular tight junction assembly, GO:0005886~plasma membrane,GO:0005923~bicellular tight junction,GO:0016021~integral component of membrane,GO:0016323~basolateral plasma membrane,GO:0016327~apicolateral plasma membrane, GO:0005198~structural molecule activity, IPR003926:Claudin-8,IPR004031:PMP-22/EMP/MP20/Claudin…
ENSBTAG00000011413 coiled-coil domain containing 107(CCDC107) Bos taurus GO:0016021~integral component of membrane, KW-0472~Membrane, KW-0175~Coiled coil,KW-0732~Signal,KW-0812~Transmembrane,KW-1133~Transmembrane helix, COMPBIAS:Polar residues,REGION:Disordered,TRANSMEM:Helical,
ENSBTAG00000040360 coiled-coil domain containing 166(CCDC166) Bos taurus KW-0175~Coiled coil, COMPBIAS:Basic and acidic residues,COMPBIAS:Polar residues,DOMAIN:DUF4515,REGION:Disordered,
ENSBTAG00000015516 coiled-coil domain containing 28A(CCDC28A) Bos taurus IPR025271:Domain of unknown function DUF4061, KW-0175~Coiled coil, COMPBIAS:Polar residues,REGION:Disordered,
ENSBTAG00000021346 coiled-coil domain containing 34(CCDC34) Bos taurus KW-0175~Coiled coil, COMPBIAS:Acidic residues,DOMAIN:DUF4207,REGION:Disordered,
ENSBTAG00000054829 coiled-coil domain-containing protein 3-like(LOC112447011) Bos taurus GO:0010629~negative regulation of gene expression, GO:0005576~extracellular region,
ENSBTAG00000040295 coiled-coil-helix-coiled-coil-helix domain containing 2(CHCHD2) Bos taurus GO:0007005~mitochondrion organization,GO:0045944~positive regulation of transcription from RNA polymerase II promoter, GO:0005634~nucleus,GO:0005739~mitochondrion, GO:0043565~sequence-specific DNA binding, COMPBIAS:Polar residues,COMPBIAS:Pro residues,REGION:Disordered,
ENSBTAG00000000678 cold shock domain containing E1(CSDE1) Bos taurus GO:0034063~stress granule assembly,GO:0070966~nuclear-transcribed mRNA catabolic process, no-go decay,GO:0075522~IRES-dependent viral translational initiation, GO:0005794~Golgi apparatus,GO:0005829~cytosol,GO:0005886~plasma membrane,GO:0070937~CRD-mediated mRNA stability complex, GO:0003676~nucleic acid binding,GO:0035613~RNA st…
ENSBTAG00000013662 collagen type VIII alpha 1 chain(COL8A1) Bos taurus GO:0010811~positive regulation of cell-substrate adhesion,GO:0030198~extracellular matrix organization,GO:0035987~endodermal cell differentiation,GO:0048593~camera-type eye morphogenesis,GO:0050673~epithelial cell proliferation, GO:0005576~extracellular region,GO:0005581~collagen trimer,GO:0005615~extracellular space,GO:003101…
ENSBTAG00000019807 collagen type XXVII alpha 1 chain(COL27A1) Bos taurus GO:0030198~extracellular matrix organization, GO:0005615~extracellular space,GO:0031012~extracellular matrix, GO:0005201~extracellular matrix structural constituent, IPR000885:Fibrillar collagen, C-terminal,IPR001791:Laminin G domain,IPR008160:Collagen triple helix repeat,IPR013320:Concanavalin A-like lectin/glucanase, subgr…
ENSBTAG00000053199 cornichon family AMPA receptor auxiliary protein 3(CNIH3) Bos taurus GO:0016192~vesicle-mediated transport,GO:2000311~regulation of AMPA receptor activity, GO:0016021~integral component of membrane,GO:0030425~dendrite,GO:0045202~synapse, IPR003377:Cornichon, SM01398:SM01398, KW-0472~Membrane, KW-0812~Transmembrane, TRANSMEM:Helical,
ENSBTAG00000019471 cornichon family AMPA receptor auxiliary protein 4(CNIH4) Bos taurus GO:0006888~ER to Golgi vesicle-mediated transport,GO:0015031~protein transport, GO:0005783~endoplasmic reticulum,GO:0005789~endoplasmic reticulum membrane,GO:0005793~endoplasmic reticulum-Golgi intermediate compartment,GO:0016021~integral component of membrane,GO:0030134~ER to Golgi transport vesicle, GO:00317…
ENSBTAG00000045847 cortexin 2(CTXN2) Bos taurus GO:0016021~integral component of membrane, IPR020066:Cortexin, KW-0472~Membrane, KW-0812~Transmembrane,KW-1133~Transmembrane helix, TRANSMEM:Helical,
ENSBTAG00000013363 cyclase associated actin cytoskeleton regulatory protein 1(CAP1) Bos taurus GO:0000902~cell morphogenesis,GO:0019933~cAMP-mediated signaling,GO:0030036~actin cytoskeleton organization,GO:0045761~regulation of adenylate cyclase activity, GO:0005737~cytoplasm,GO:0005886~plasma membrane, GO:0003779~actin binding,GO:0008179~adenylate cyclase binding, IPR001837:Adenylate cyclase-ass…
ENSBTAG00000021118 cytochrome P450, family 26, subfamily A, polypeptide 1(CYP26A1) Bos taurus Secondary metabolites biosynthesis, transport, and catabolism, GO:0006805~xenobiotic metabolic process,GO:0016125~sterol metabolic process,GO:0034653~retinoic acid catabolic process, GO:0016020~membrane, GO:0001972~retinoic acid binding,GO:0004497~monooxygenase activity,GO:0005506~iron ion binding,GO:000…
ENSBTAG00000017665 dehydrogenase/reductase (SDR family) member 4(DHRS4) Bos taurus GO:0001523~retinoid metabolic process,GO:0008202~steroid metabolic process,GO:0042180~cellular ketone metabolic process,GO:0042572~retinol metabolic process,GO:0042574~retinal metabolic process, GO:0005739~mitochondrion,GO:0005777~peroxisome, GO:0001758~retinal dehydrogenase activity,GO:0004090~carbonyl reductase (…
ENSBTAG00000015533 dispatched RND transporter family member 3(DISP3) Bos taurus General function prediction only, GO:0045665~negative regulation of neuron differentiation,GO:0045834~positive regulation of lipid metabolic process,GO:2000179~positive regulation of neural precursor cell proliferation, GO:0005737~cytoplasm,GO:0016021~integral component of membrane, IPR000731:Sterol-sensing domain,IPR…
ENSBTAG00000000106 divergent protein kinase domain 1C(DIPK1C) Bos taurus GO:0005789~endoplasmic reticulum membrane,GO:0016021~integral component of membrane, IPR011009:Protein kinase-like domain,IPR022049:Uncharacterised protein family FAM69, SM01299:SM01299, KW-0472~Membrane, KW-0812~Transmembrane, COMPBIAS:Basic and acidic residues,DOMAIN:PIP49_N,REGION:Disordered,TRANSMEM:Helical,
ENSBTAG00000032650 dpy-19 like 2(DPY19L2) Bos taurus GO:0007286~spermatid development,GO:0018406~protein C-linked glycosylation via 2'-alpha-mannosyl-L-tryptophan, GO:0005637~nuclear inner membrane,GO:0016021~integral component of membrane, GO:0000030~mannosyltransferase activity, IPR018732:Dpy-19, KW-0472~Membrane, KW-0812~Transmembrane, COMPBIAS:Basic and acidic residues,REGION:Disordered,TRANS…
ENSBTAG00000017551 drosha ribonuclease III(DROSHA) Bos taurus GO:0006396~RNA processing,GO:0010586~miRNA metabolic process,GO:0010628~positive regulation of gene expression,GO:0016075~rRNA catabolic process,GO:0030422~production of siRNA involved in RNA interference,GO:0031053~primary miRNA processing,GO:0031054~pre-miRNA processing,GO:0045589~regulation of regulatory T cell differentiation,GO:00…
ENSBTAG00000038151 elongation factor 1(ELOF1) Bos taurus GO:0006368~transcription elongation from RNA polymerase II promoter,GO:0048096~chromatin-mediated maintenance of transcription, GO:0008023~transcription elongation factor complex, GO:0000993~RNA polymerase II core binding,GO:0046872~metal ion binding, IPR007808:Transcription elongation factor 1, KW-0804~Transcription,KW-0805~Transcription r…
ENSBTAG00000003410 elongation factor like GTPase 1(EFL1) Bos taurus GO:0042256~mature ribosome assembly,GO:0046039~GTP metabolic process, GO:1990904~ribonucleoprotein complex, GO:0003924~GTPase activity,GO:0005525~GTP binding,GO:0043022~ribosome binding, IPR000640:Translation elongation factor EFG, V domain,IPR000795:Elongation factor, GTP-binding domain,IPR005225:Small GTP-binding protein domain…
ENSBTAG00000003887 ethylmalonyl-CoA decarboxylase 1(ECHDC1) Bos taurus Lipid metabolism, GO:0006635~fatty acid beta-oxidation, GO:0005829~cytosol, GO:0003824~catalytic activity,GO:0004300~enoyl-CoA hydratase activity,GO:0016831~carboxy-lyase activity, IPR001753:Crotonase superfamily,IPR018376:Enoyl-CoA hydratase/isomerase, conserved site, bta00640:Propanoate metabolism,bta01100:Metabolic pathways…
ENSBTAG00000002528 eukaryotic translation initiation factor 3 subunit A(EIF3A) Bos taurus GO:0001732~formation of cytoplasmic translation initiation complex,GO:0002188~translation reinitiation,GO:0075522~IRES-dependent viral translational initiation,GO:0075525~viral translational termination-reinitiation, GO:0005654~nucleoplasm,GO:0005730~nucleolus,GO:0005829~cytosol,GO:0014069~postsynaptic densi…
ENSBTAG00000014724 eukaryotic translation initiation factor 4A2(EIF4A2) Bos taurus GO:0006413~translational initiation, GO:0005730~nucleolus,GO:0071013~catalytic step 2 spliceosome, GO:0003676~nucleic acid binding,GO:0003723~RNA binding,GO:0003724~RNA helicase activity,GO:0003729~mRNA binding,GO:0003743~translation initiation factor activity,GO:0005524~ATP binding,GO:0016787~hydrolase activity,GO…
ENSBTAG00000006111 exocyst complex component 8(EXOC8) Bos taurus GO:0006887~exocytosis,GO:0006893~Golgi to plasma membrane transport,GO:0007032~endosome organization,GO:0008104~protein localization,GO:0015031~protein transport,GO:0022617~extracellular matrix disassembly, GO:0000145~exocyst,GO:0005770~late endosome,GO:0030426~growth cone,GO:0048471~perinuclear region of cytoplasm, GO:0031267~small…
ENSBTAG00000006209 exostosin glycosyltransferase 1(EXT1) Bos taurus GO:0001958~endochondral ossification,GO:0001974~blood vessel remodeling,GO:0002067~glandular epithelial cell differentiation,GO:0002524~hypersensitivity,GO:0003128~heart field specification,GO:0003415~chondrocyte hypertrophy,GO:0003416~endochondral bone growth,GO:0006486~protein glycosylation,GO:0007033~vacuole organization,GO:00…
ENSBTAG00000019026 exostosin like glycosyltransferase 2(EXTL2) Bos taurus GO:0006044~N-acetylglucosamine metabolic process,GO:0006486~protein glycosylation,GO:0019276~UDP-N-acetylgalactosamine metabolic process, GO:0005654~nucleoplasm,GO:0005789~endoplasmic reticulum membrane,GO:0005829~cytosol,GO:0016021~integral component of membrane, GO:0001888~glucuronyl-galactosyl-proteoglycan 4-alpha-N-acet…
ENSBTAG00000010609 family with sequence similarity 221, member A(FAM221A) Bos taurus GO:0001669~acrosomal vesicle,GO:0005634~nucleus,GO:0005737~cytoplasm, GO:0004518~nuclease activity,GO:0004672~protein kinase activity,GO:0005524~ATP binding, IPR000719:Protein kinase, catalytic domain,IPR002999:Tudor domain,IPR011009:Protein kinase-like domain,IPR026755:Protein FAM221A, SM00220:S_TKc,SM00333:TUDO…
ENSBTAG00000001462 fms related receptor tyrosine kinase 4(FLT4) Bos taurus GO:0001525~angiogenesis,GO:0001934~positive regulation of protein phosphorylation,GO:0001938~positive regulation of endothelial cell proliferation,GO:0001946~lymphangiogenesis,GO:0002244~hematopoietic progenitor cell differentiation,GO:0007169~transmembrane receptor protein tyrosine kinase signaling pathway,GO:0010575~posi…
ENSBTAG00000035084 frizzled class receptor 3(FZD3) Bos taurus GO:0001736~establishment of planar polarity,GO:0001764~neuron migration,GO:0001843~neural tube closure,GO:0001942~hair follicle development,GO:0002052~positive regulation of neuroblast proliferation,GO:0033278~cell proliferation in midbrain,GO:0036342~post-anal tail morphogenesis,GO:0036514~dopaminergic neuron axon guidance,GO:0036515~…
ENSBTAG00000038480 fucose-1-phosphate guanylyltransferase(FPGT) Bos taurus GO:0000166~nucleotide binding,GO:0016772~transferase activity, transferring phosphorus-containing groups, IPR011004:Trimeric LpxA-like,IPR012120:Fucose-1-phosphate guanylyltransferase,IPR012887:L-fucokinase, bta00051:Fructose and mannose metabolism,bta00520:Amino sugar and nucleotide sugar metabolism,bta01100:Metabolic pat…
ENSBTAG00000017837 gamma-aminobutyric acid type A receptor subunit beta1(GABRB1) Bos taurus GO:0006811~ion transport,GO:0007165~signal transduction,GO:0007214~gamma-aminobutyric acid signaling pathway,GO:0007268~chemical synaptic transmission,GO:0034220~ion transmembrane transport,GO:0042391~regulation of membrane potential,GO:0050877~neurological system process,GO:0071420~cellular response to hi…
ENSBTAG00000016186 germ cell-less protein-like 2(LOC112445444) Bos taurus GO:0007281~germ cell development, GO:0005634~nucleus, IPR000210:BTB/POZ-like,IPR011333:BTB/POZ fold, SM00225:BTB, KW-0217~Developmental protein,KW-9996~Developmental protein, DOMAIN:BTB,REGION:Disordered,
ENSBTAG00000050199 germ cell-less, spermatogenesis associated 1 pseudogene(LOC786530) Bos taurus GO:0007281~germ cell development, GO:0005634~nucleus, IPR000210:BTB/POZ-like,IPR011333:BTB/POZ fold, SM00225:BTB, KW-0217~Developmental protein,KW-9996~Developmental protein, COMPBIAS:Acidic residues,COMPBIAS:Basic and acidic residues,DOMAIN:BTB,REGION:Disordered,
ENSBTAG00000034854 glutamate ionotropic receptor kainate type subunit 1(GRIK1) Bos taurus GO:0035249~synaptic transmission, glutamatergic,GO:0050804~modulation of synaptic transmission, GO:0005886~plasma membrane,GO:0016021~integral component of membrane,GO:0045211~postsynaptic membrane, GO:0004970~ionotropic glutamate receptor activity,GO:0008066~glutamate receptor activity,GO:0015276~ligand-gat…
ENSBTAG00000002215 glutamine-fructose-6-phosphate transaminase 2(GFPT2) Bos taurus GO:0006002~fructose 6-phosphate metabolic process,GO:0006047~UDP-N-acetylglucosamine metabolic process,GO:0006048~UDP-N-acetylglucosamine biosynthetic process,GO:0006487~protein N-linked glycosylation,GO:0006541~glutamine metabolic process,GO:1990830~cellular response to leukemia inhibitory factor, GO:0004360~gluta…
ENSBTAG00000012540 glycine N-phenylacetyltransferase-like(LOC112441481) Bos taurus GO:0006544~glycine metabolic process, GO:0005739~mitochondrion, GO:0016410~N-acyltransferase activity,GO:0047961~glycine N-acyltransferase activity,GO:0047962~glycine N-benzoyltransferase activity, IPR010313:Glycine N-acyltransferase,IPR013652:Glycine N-acyltransferase, C-terminal,IPR015938:Glycine N-acyltransferas…
ENSBTAG00000038323 glycine-N-acyltransferase(GLYAT) Bos taurus GO:0006544~glycine metabolic process,GO:0009636~response to toxic substance,GO:0032787~monocarboxylic acid metabolic process, GO:0005739~mitochondrion, GO:0016410~N-acyltransferase activity,GO:0047961~glycine N-acyltransferase activity,GO:0047962~glycine N-benzoyltransferase activity, IPR010313:Glycine N-acyltransferase,IPR013652:Glyc…
ENSBTAG00000052095 glycine-N-acyltransferase-like(GAT) Bos taurus GO:0006544~glycine metabolic process, GO:0005739~mitochondrion, GO:0016410~N-acyltransferase activity,GO:0047961~glycine N-acyltransferase activity,GO:0047962~glycine N-benzoyltransferase activity,GO:0102080~phenylacetyl-coenzyme A:glycine N-acyltransferase activity, IPR010313:Glycine N-acyltransferase,IPR013652:Glycine N-acyltrans…
ENSBTAG00000013203 glycoprotein V platelet(GP5) Bos taurus GO:0016021~integral component of membrane, IPR000483:Cysteine-rich flanking region, C-terminal,IPR001611:Leucine-rich repeat,IPR003591:Leucine-rich repeat, typical subtype, bta04512:ECM-receptor interaction,bta04611:Platelet activation,bta04640:Hematopoietic cell lineage, SM00082:LRRCT,SM00369:LRR_TYP, KW-0472~Membrane, KW-0433~Leucine-ri…
ENSBTAG00000020406 glypican 3(GPC3) Bos taurus GO:0001658~branching involved in ureteric bud morphogenesis,GO:0009617~response to bacterium,GO:0009948~anterior/posterior axis specification,GO:0010171~body morphogenesis,GO:0016477~cell migration,GO:0030282~bone mineralization,GO:0030316~osteoclast differentiation,GO:0030324~lung development,GO:0030513~positive regulation of BMP signaling pathway,G…
ENSBTAG00000016723 growth factor independent 1 transcriptional repressor(GFI1) Bos taurus General function prediction only, GO:0006357~regulation of transcription from RNA polymerase II promoter,GO:0030097~hemopoiesis,GO:0051569~regulation of histone H3-K4 methylation, GO:0000978~RNA polymerase II core promoter proximal region sequence-specific DNA binding,GO:0003700~transcription factor activity…
ENSBTAG00000007807 heat shock protein family A (Hsp70) member 2(HSPA2) Bos taurus GO:0001934~positive regulation of protein phosphorylation,GO:0007141~male meiosis I,GO:0007283~spermatogenesis,GO:0007286~spermatid development,GO:0009408~response to heat,GO:0009409~response to cold,GO:0010971~positive regulation of G2/M transition of mitotic cell cycle,GO:0016192~vesicle-mediated transport,GO:0030…
ENSBTAG00000018598 heat shock protein family B (small) member 6(HSPB6) Bos taurus GO:0045766~positive regulation of angiogenesis,GO:0061077~chaperone-mediated protein folding, GO:0005576~extracellular region,GO:0005634~nucleus,GO:0005730~nucleolus,GO:0005737~cytoplasm,GO:0005794~Golgi apparatus,GO:0005829~cytosol, GO:0005212~structural constituent of eye lens,GO:0042803~protein homodimerization a…
ENSBTAG00000003514 heat shock transcription factor 4(HSF4) Bos taurus GO:0000122~negative regulation of transcription from RNA polymerase II promoter,GO:0006357~regulation of transcription from RNA polymerase II promoter,GO:0007601~visual perception,GO:0008284~positive regulation of cell proliferation,GO:0033169~histone H3-K9 demethylation,GO:0043010~camera-type eye development,GO:0045597~positiv…
ENSBTAG00000001553 heterogeneous nuclear ribonucleoprotein A1(HNRNPA1) Bos taurus GO:0006397~mRNA processing,GO:0008380~RNA splicing,GO:0051028~mRNA transport,GO:1903936~cellular response to sodium arsenite, GO:0005634~nucleus,GO:0005681~spliceosomal complex,GO:0005737~cytoplasm,GO:1990904~ribonucleoprotein complex, GO:0003723~RNA binding,GO:0035198~miRNA binding, IPR000504:RNA recognition motif …
ENSBTAG00000021131 heterogeneous nuclear ribonucleoprotein K(HNRNPK) Bos taurus GO:0006357~regulation of transcription from RNA polymerase II promoter,GO:0006396~RNA processing,GO:0006397~mRNA processing,GO:0008380~RNA splicing,GO:0010468~regulation of gene expression,GO:0010988~regulation of low-density lipoprotein particle clearance,GO:0043066~negative regulation of apoptotic process,GO:0045892…
ENSBTAG00000044071 histamine receptor H2(HRH2) Bos taurus GO:0001696~gastric acid secretion,GO:0007187~G-protein coupled receptor signaling pathway, coupled to cyclic nucleotide second messenger,GO:0007268~chemical synaptic transmission,GO:0045907~positive regulation of vasoconstriction, GO:0005887~integral component of plasma membrane,GO:0030425~dendrite,GO:0045202~synapse, GO:0004969~histamine …
ENSBTAG00000014287 histone H2B 1/2(LOC523458) Bos taurus GO:0006334~nucleosome assembly, GO:0000786~nucleosome, GO:0003677~DNA binding,GO:0046982~protein heterodimerization activity, IPR000558:Histone H2B,IPR007125:Histone core,IPR009072:Histone-fold, bta04613:Neutrophil extracellular trap formation,bta05034:Alcoholism,bta05203:Viral carcinogenesis,bta05322:Systemic lupus erythematosus, SM00427:H…
ENSBTAG00000001793 hydroxysteroid 11-beta dehydrogenase 1 like(HSD11B1L) Bos taurus GO:0005576~extracellular region,GO:0005654~nucleoplasm, GO:0016491~oxidoreductase activity, IPR002347:Glucose/ribitol dehydrogenase,IPR020904:Short-chain dehydrogenase/reductase, conserved site, bta00140:Steroid hormone biosynthesis,bta00980:Metabolism of xenobiotics by cytochrome P450,bta01100:Metabolic pathways,…
ENSBTAG00000015050 hyperpolarization activated cyclic nucleotide gated potassium and sodium channel 2(HCN2) Bos taurus GO:0042391~regulation of membrane potential,GO:0071320~cellular response to cAMP,GO:0071321~cellular response to cGMP,GO:0098719~sodium ion import across plasma membrane,GO:1990573~potassium ion import across plasma membrane, GO:0005886~plasma membrane,GO:0016021~integral compone…
ENSBTAG00000016169 inhibitor of DNA binding 1, HLH protein(ID1) Bos taurus GO:0000122~negative regulation of transcription from RNA polymerase II promoter,GO:0030154~cell differentiation,GO:0032922~circadian regulation of gene expression,GO:0043433~negative regulation of sequence-specific DNA binding transcription factor activity, GO:0005634~nucleus,GO:0005654~nucleoplasm,GO:0005794~Golgi apparat…
ENSBTAG00000010316 intercellular adhesion molecule 5(ICAM5) Bos taurus GO:0006909~phagocytosis,GO:0007155~cell adhesion,GO:0098609~cell-cell adhesion, GO:0005887~integral component of plasma membrane, GO:0005178~integrin binding, IPR003598:Immunoglobulin subtype 2,IPR003599:Immunoglobulin subtype,IPR003987:Intercellular adhesion molecule/vascular cell adhesion molecule, N-terminal,IPR003988:Inter…
ENSBTAG00000053869 interleukin 1 receptor accessory protein like 1(IL1RAPL1) Bos taurus GO:0007165~signal transduction,GO:0045920~negative regulation of exocytosis,GO:0099545~trans-synaptic signaling by trans-synaptic complex,GO:1905606~regulation of presynapse assembly, GO:0005886~plasma membrane,GO:0016021~integral component of membrane,GO:0098978~glutamatergic synapse, IPR000157:Toll/interleuk…
ENSBTAG00000018474 interleukin 6 receptor(IL6R) Bos taurus GO:0008284~positive regulation of cell proliferation,GO:0010536~positive regulation of activation of Janus kinase activity,GO:0010573~vascular endothelial growth factor production,GO:0019221~cytokine-mediated signaling pathway,GO:0031018~endocrine pancreas development,GO:0032722~positive regulation of chemokine production,GO:0032755~posit…
ENSBTAG00000016284 interleukin 7(IL7) Bos taurus GO:0001961~positive regulation of cytokine-mediated signaling pathway,GO:0002360~T cell lineage commitment,GO:0006955~immune response,GO:0019221~cytokine-mediated signaling pathway,GO:0030890~positive regulation of B cell proliferation,GO:0032722~positive regulation of chemokine production,GO:0043066~negative regulation of apoptotic process,GO:0043…
ENSBTAG00000012817 jagged canonical Notch ligand 1(JAG1) Bos taurus GO:0001953~negative regulation of cell-matrix adhesion,GO:0001974~blood vessel remodeling,GO:0002011~morphogenesis of an epithelial sheet,GO:0002456~T cell mediated immunity,GO:0003184~pulmonary valve morphogenesis,GO:0003215~cardiac right ventricle morphogenesis,GO:0007219~Notch signaling pathway,GO:0022408~negative regulation o…
ENSBTAG00000005263 kelch like family member 2(KLHL2) Bos taurus GO:0015629~actin cytoskeleton,GO:0016021~integral component of membrane, GO:0003779~actin binding,GO:0042802~identical protein binding, IPR000210:BTB/POZ-like,IPR006652:Kelch repeat type 1,IPR011043:Galactose oxidase/kelch, beta-propeller,IPR011333:BTB/POZ fold,IPR011705:BTB/Kelch-associated,IPR015915:Kelch-type beta propeller,IPR017…
ENSBTAG00000007923 late endosomal/lysosomal adaptor, MAPK and MTOR activator 3(LAMTOR3) Bos taurus GO:0032008~positive regulation of TOR signaling,GO:0033674~positive regulation of kinase activity,GO:0034613~cellular protein localization,GO:0043410~positive regulation of MAPK cascade,GO:0071230~cellular response to amino acid stimulus,GO:1902414~protein localization to cell junction, GO:0071986~R…
ENSBTAG00000004738 leucine rich repeat containing 47(LRRC47) Bos taurus Function unknown, GO:0003723~RNA binding,GO:0004826~phenylalanine-tRNA ligase activity, IPR001611:Leucine-rich repeat,IPR003591:Leucine-rich repeat, typical subtype,IPR005146:B3/B4 tRNA-binding domain,IPR020825:Phenylalanyl-tRNA synthetase, B3/B4, SM00369:LRR_TYP,SM00873:SM00873, KW-0175~Coiled coil,KW-0433~Leucine-rich repea…
ENSBTAG00000010360 leucine rich repeats and immunoglobulin like domains 1(LRIG1) Bos taurus GO:0007605~sensory perception of sound,GO:0022405~hair cycle process,GO:0032474~otolith morphogenesis,GO:0060384~innervation, GO:0005615~extracellular space,GO:0016021~integral component of membrane,GO:0031012~extracellular matrix, IPR000372:Leucine-rich repeat-containing N-terminal,IPR000483:Cysteine-rich…
ENSBTAG00000012659 ligand dependent nuclear receptor interacting factor 1(LRIF1) Bos taurus GO:0006355~regulation of transcription, DNA-templated,GO:0009048~dosage compensation by inactivation of X chromosome, GO:0000781~chromosome, telomeric region,GO:0001740~Barr body,GO:0005654~nucleoplasm,GO:0034451~centriolar satellite, GO:0042974~retinoic acid receptor binding, IPR026191:Ligand-dependent nu…
ENSBTAG00000000134 mannose-P-dolichol utilization defect 1(MPDU1) Bos taurus GO:0006488~dolichol-linked oligosaccharide biosynthetic process,GO:0009312~oligosaccharide biosynthetic process, GO:0016021~integral component of membrane, IPR006603:Cystinosin/ERS1p repeat,IPR016817:Mannose-P-dolichol utilization defect 1 protein, PIRSF023381:mannose-P-dolichol utilization defect 1 protein, SM00679:CTNS…
ENSBTAG00000049584 melanoma-associated antigen 10-like(LOC618806) Bos taurus IPR002190:MAGE protein, SM01373:SM01373, DOMAIN:MAGE,
ENSBTAG00000003361 methyltransferase like 15(METTL15) Bos taurus GO:0070475~rRNA base methylation, GO:0005759~mitochondrial matrix, GO:0071424~rRNA (cytosine-N4-)-methyltransferase activity, IPR002903:Ribosomal RNA small subunit methyltransferase H,IPR023397:S-adenosyl-L-methionine-dependent methyltransferase, MraW, recognition domain, KW-0496~Mitochondrion, KW-0809~Transit peptide, KW-0949~S-ade…
ENSBTAG00000006613 methyltransferase like 17(METTL17) Bos taurus GO:0006412~translation,GO:0032259~methylation,GO:0042274~ribosomal small subunit biogenesis, GO:0005654~nucleoplasm,GO:0005739~mitochondrion,GO:0005759~mitochondrial matrix, GO:0008168~methyltransferase activity,GO:1904047~S-adenosyl-L-methionine binding, IPR015324:Ribosomal protein Rsm22, bacterial-type, KW-0496~Mitochondrion, KW-0…
ENSBTAG00000019556 migration and invasion inhibitory protein(MIIP) Bos taurus GO:0010972~negative regulation of G2/M transition of mitotic cell cycle,GO:0030336~negative regulation of cell migration, COMPBIAS:Polar residues,COMPBIAS:Pro residues,REGION:Disordered,
ENSBTAG00000001792 mitochondrial contact site and cristae organizing system subunit 13(MICOS13) Bos taurus GO:0042407~cristae formation, GO:0005654~nucleoplasm,GO:0044284~mitochondrial crista junction,GO:0061617~MICOS complex, IPR026769:Protein QIL1, KW-0472~Membrane, KW-0812~Transmembrane,KW-1133~Transmembrane helix,
ENSBTAG00000018426 mitochondrial ribosome recycling factor(MRRF) Bos taurus GO:0006412~translation,GO:0032790~ribosome disassembly, GO:0005739~mitochondrion, GO:0043023~ribosomal large subunit binding, IPR002661:Ribosome recycling factor,IPR023584:Ribosome recycling factor domain, KW-0648~Protein biosynthesis, KW-0496~Mitochondrion, KW-0175~Coiled coil,KW-0809~Transit peptide, COMPBIAS:Pro residu…
ENSBTAG00000010689 neuregulin 2(NRG2) Bos taurus GO:0007399~nervous system development,GO:0035556~intracellular signal transduction,GO:0048513~animal organ development, GO:0005576~extracellular region,GO:0005615~extracellular space,GO:0016021~integral component of membrane, GO:0005102~receptor binding,GO:0008083~growth factor activity, IPR000742:Epidermal growth factor-like domain,IPR002154:Neure…
ENSBTAG00000039530 neurofilament medium chain(NEFM) Bos taurus GO:0033693~neurofilament bundle assembly, GO:0005883~neurofilament,GO:0030424~axon, GO:0005198~structural molecule activity, IPR002957:Keratin, type I,IPR006821:Intermediate filament head, DNA-binding domain,IPR018039:Intermediate filament protein, conserved site, bta05014:Amyotrophic lateral sclerosis,bta05022:Pathways of neurodegene…
ENSBTAG00000023169 ninein like(NINL) Bos taurus GO:0034454~microtubule anchoring at centrosome, GO:0005813~centrosome, GO:0005509~calcium ion binding, IPR002048:EF-hand domain,IPR011992:EF-hand-like domain,IPR018247:EF-Hand 1, calcium-binding site, SM00054:EFh, KW-0175~Coiled coil, KW-0479~Metal-binding, COMPBIAS:Basic and acidic residues,DOMAIN:EF-hand,REGION:Disordered,
ENSBTAG00000009265 nuclear receptor subfamily 5 group A member 2(NR5A2) Bos taurus GO:0006357~regulation of transcription from RNA polymerase II promoter,GO:0008206~bile acid metabolic process,GO:0009755~hormone-mediated signaling pathway,GO:0009888~tissue development,GO:0030855~epithelial cell differentiation,GO:0042127~regulation of cell proliferation,GO:0042632~cholesterol homeostasis,GO:00450…
ENSBTAG00000023614 nudix hydrolase 19(NUDT19) Bos taurus GO:0015938~coenzyme A catabolic process,GO:0036114~medium-chain fatty-acyl-CoA catabolic process,GO:0044580~butyryl-CoA catabolic process,GO:1901289~succinyl-CoA catabolic process,GO:1902858~propionyl-CoA metabolic process,GO:2001294~malonyl-CoA catabolic process, GO:0000287~magnesium ion binding,GO:0016787~hydrolase activity,GO:0046872~met…
ENSBTAG00000046387 olfactory receptor family 4 subfamily C member 185(OR4C185) Bos taurus GO:0016021~integral component of membrane, GO:0004930~G-protein coupled receptor activity,GO:0004984~olfactory receptor activity, IPR000276:G protein-coupled receptor, rhodopsin-like,IPR000725:Olfactory receptor,IPR017452:GPCR, rhodopsin-like, 7TM, bta04740:Olfactory transduction, KW-0472~Membrane, KW-0812~T…
ENSBTAG00000054316 olfactory receptor family 4 subfamily C member 1E(OR4C1E) Bos taurus GO:0005886~plasma membrane,GO:0016021~integral component of membrane, GO:0004930~G-protein coupled receptor activity,GO:0004984~olfactory receptor activity, IPR000276:G protein-coupled receptor, rhodopsin-like,IPR000725:Olfactory receptor,IPR017452:GPCR, rhodopsin-like, 7TM, bta04740:Olfactory transduction, KW…
ENSBTAG00000027490 olfactory receptor family 5 subfamily A member 1(OR5A1) Bos taurus GO:0005886~plasma membrane,GO:0016021~integral component of membrane, GO:0004930~G-protein coupled receptor activity,GO:0004984~olfactory receptor activity,GO:0005549~odorant binding, IPR000276:G protein-coupled receptor, rhodopsin-like,IPR000725:Olfactory receptor,IPR017452:GPCR, rhodopsin-like, 7TM, bta04740:O…
ENSBTAG00000049719 olfactory receptor family 5 subfamily B member 12(OR5B12) Bos taurus GO:0007186~G-protein coupled receptor signaling pathway,GO:0007608~sensory perception of smell, GO:0005886~plasma membrane,GO:0016021~integral component of membrane, GO:0004930~G-protein coupled receptor activity,GO:0004984~olfactory receptor activity,GO:0005549~odorant binding, IPR000276:G protein-coupled rec…
ENSBTAG00000038249 olfactory receptor family 5 subfamily C member 1(OR5C1) Bos taurus GO:0005886~plasma membrane,GO:0016021~integral component of membrane, GO:0004930~G-protein coupled receptor activity,GO:0004984~olfactory receptor activity,GO:0005549~odorant binding, IPR000276:G protein-coupled receptor, rhodopsin-like,IPR000725:Olfactory receptor,IPR017452:GPCR, rhodopsin-like, 7TM, bta04740:O…
ENSBTAG00000035659 olfactory receptor family 5 subfamily L member 1C(OR5L1C) Bos taurus GO:0007186~G-protein coupled receptor signaling pathway,GO:0007608~sensory perception of smell, GO:0005886~plasma membrane,GO:0016021~integral component of membrane, GO:0004930~G-protein coupled receptor activity,GO:0004984~olfactory receptor activity,GO:0005549~odorant binding, IPR000276:G protein-coupled rec…
ENSBTAG00000049790 olfactory receptor family 5 subfamily M member 9(OR5M9) Bos taurus GO:0007186~G-protein coupled receptor signaling pathway,GO:0007608~sensory perception of smell, GO:0005886~plasma membrane,GO:0016021~integral component of membrane, GO:0004930~G-protein coupled receptor activity,GO:0004984~olfactory receptor activity,GO:0005549~odorant binding, IPR000276:G protein-coupled recep…
ENSBTAG00000049396 olfactory receptor family 7 subfamily A member 126(OR7A126) Bos taurus GO:0016021~integral component of membrane, GO:0004930~G-protein coupled receptor activity,GO:0004984~olfactory receptor activity, IPR000276:G protein-coupled receptor, rhodopsin-like,IPR000725:Olfactory receptor,IPR017452:GPCR, rhodopsin-like, 7TM, bta04740:Olfactory transduction, KW-0472~Membrane, KW-0812~T…
ENSBTAG00000054804 olfactory receptor family 8 subfamily K member 64(OR8K64) Bos taurus GO:0007186~G-protein coupled receptor signaling pathway,GO:0007608~sensory perception of smell, GO:0005886~plasma membrane,GO:0016021~integral component of membrane, GO:0004930~G-protein coupled receptor activity,GO:0004984~olfactory receptor activity,GO:0005549~odorant binding, IPR000276:G protein-coupled rec…
ENSBTAG00000004076 oxoeicosanoid receptor 1(OXER1) Bos taurus GO:0007193~adenylate cyclase-inhibiting G-protein coupled receptor signaling pathway, GO:0016021~integral component of membrane, GO:0004930~G-protein coupled receptor activity,GO:0050646~5-oxo-6E,8Z,11Z,14Z-icosatetraenoic acid binding,GO:0050647~5-hydroxy-6E,8Z,11Z,14Z-icosatetraenoic acid binding,GO:0050648~5(S)-hydroxyperoxy-6E,8Z,1…
ENSBTAG00000019772 oxytocin receptor(OXTR) Bos taurus GO:0001992~regulation of systemic arterial blood pressure by vasopressin,GO:0007186~G-protein coupled receptor signaling pathway,GO:0007565~female pregnancy,GO:0045777~positive regulation of blood pressure,GO:0045907~positive regulation of vasoconstriction,GO:0060137~maternal process involved in parturition, GO:0005887~integral component of pl…
ENSBTAG00000009059 paired like homeodomain 2(PITX2) Bos taurus Transcription, GO:0006357~regulation of transcription from RNA polymerase II promoter,GO:0009653~anatomical structure morphogenesis,GO:0035993~deltoid tuberosity development,GO:0042476~odontogenesis,GO:0045944~positive regulation of transcription from RNA polymerase II promoter,GO:0061072~iris morphogenesis, GO:0005634~nucleus,GO:0005…
ENSBTAG00000008361 paraoxonase 2(PON2) Bos taurus Carbohydrate transport and metabolism, GO:0009636~response to toxic substance,GO:0019439~aromatic compound catabolic process, GO:0005576~extracellular region,GO:0005886~plasma membrane, GO:0004064~arylesterase activity,GO:0042802~identical protein binding,GO:0046872~metal ion binding,GO:0102007~acyl-L-homoserine-lactone lactonohydrolase activity, …
ENSBTAG00000053735 paternally expressed 10(PEG10) Bos taurus GO:0005829~cytosol, GO:0003676~nucleic acid binding,GO:0008270~zinc ion binding, IPR001878:Zinc finger, CCHC-type,IPR005162:Retrotransposon gag protein, KW-0863~Zinc-finger, KW-0479~Metal-binding,KW-0862~Zinc, COMPBIAS:Basic and acidic residues,COMPBIAS:Polar residues,COMPBIAS:Pro residues,DOMAIN:CCHC-type,REGION:Disordered,
ENSBTAG00000013538 peroxisomal biogenesis factor 14(PEX14) Bos taurus GO:0016558~protein import into peroxisome matrix,GO:0016560~protein import into peroxisome matrix, docking,GO:0016561~protein import into peroxisome matrix, translocation,GO:0032091~negative regulation of protein binding,GO:0034453~microtubule anchoring,GO:0036250~peroxisome transport along microtubule,GO:0043433~negative regul…
ENSBTAG00000013219 peroxisomal biogenesis factor 5 like(PEX5L) Bos taurus GO:0016560~protein import into peroxisome matrix, docking, GO:0005737~cytoplasm,GO:0005778~peroxisomal membrane,GO:0005829~cytosol,GO:0016020~membrane,GO:0043235~receptor complex, GO:0005052~peroxisome matrix targeting signal-1 binding,GO:0005221~intracellular cyclic nucleotide activated cation channel activity,GO:0031267~s…
ENSBTAG00000007320 phosphatidylinositol 4-kinase beta(PI4KB) Bos taurus GO:0016310~phosphorylation,GO:0046854~phosphatidylinositol phosphorylation,GO:0048015~phosphatidylinositol-mediated signaling, GO:0000139~Golgi membrane,GO:0005737~cytoplasm,GO:0005741~mitochondrial outer membrane,GO:0016020~membrane,GO:0030867~rough endoplasmic reticulum membrane, GO:0004430~1-phosphatidylinositol 4-kinase a…
ENSBTAG00000016663 phosphatidylinositol glycan anchor biosynthesis class N(PIGN) Bos taurus GO:0006506~GPI anchor biosynthetic process, GO:0005789~endoplasmic reticulum membrane,GO:0005829~cytosol,GO:0005886~plasma membrane,GO:0016021~integral component of membrane, GO:0051377~mannose-ethanolamine phosphotransferase activity, IPR002591:Type I phosphodiesterase/nucleotide pyrophosphatase/phosphate…
ENSBTAG00000024888 phosphodiesterase 5A(PDE5A) Bos taurus GO:0007165~signal transduction,GO:0046069~cGMP catabolic process, GO:0004112~cyclic-nucleotide phosphodiesterase activity,GO:0004114~3',5'-cyclic-nucleotide phosphodiesterase activity,GO:0030553~cGMP binding,GO:0046872~metal ion binding,GO:0047555~3',5'-cyclic-GMP phosphodiesterase activity, IPR002073:3'5'-cyclic nucleotide phosphodiestera…
ENSBTAG00000005759 phospholipase A2, group IIA (platelets, synovial fluid)(PLA2G2A) Bos taurus GO:0006644~phospholipid metabolic process,GO:0006954~inflammatory response,GO:0016042~lipid catabolic process,GO:0019835~cytolysis,GO:0036335~intestinal stem cell homeostasis,GO:0046337~phosphatidylethanolamine metabolic process,GO:0046470~phosphatidylcholine metabolic process,GO:0050482~arachidonic aci…
ENSBTAG00000007173 platelet derived growth factor receptor alpha(PDGFRA) Bos taurus GO:0001553~luteinization,GO:0001701~in utero embryonic development,GO:0002244~hematopoietic progenitor cell differentiation,GO:0006935~chemotaxis,GO:0007169~transmembrane receptor protein tyrosine kinase signaling pathway,GO:0007204~positive regulation of cytosolic calcium ion concentration,GO:0008210~estrogen met…
ENSBTAG00000019090 pleckstrin homology, MyTH4 and FERM domain containing H3(PLEKHH3) Bos taurus GO:0007165~signal transduction, GO:0005856~cytoskeleton, IPR000159:Ras-association,IPR000299:FERM domain,IPR000857:MyTH4 domain,IPR001849:Pleckstrin homology domain,IPR011993:Pleckstrin homology-like domain,IPR014352:FERM/acyl-CoA-binding protein, 3-helical bundle,IPR019748:FERM central domain,IPR01974…
ENSBTAG00000047488 potassium two pore domain channel subfamily K member 9(KCNK9) Bos taurus GO:0030322~stabilization of membrane potential,GO:0071805~potassium ion transmembrane transport,GO:1990573~potassium ion import across plasma membrane, GO:0005887~integral component of plasma membrane, GO:0005249~voltage-gated potassium channel activity,GO:0022841~potassium ion leak channel activity, IPR00…
ENSBTAG00000047842 prolactin releasing hormone receptor(PRLHR) Bos taurus GO:0007218~neuropeptide signaling pathway,GO:0007631~feeding behavior,GO:0042445~hormone metabolic process, GO:0005886~plasma membrane,GO:0005929~cilium,GO:0016021~integral component of membrane, GO:0004983~neuropeptide Y receptor activity, IPR000276:G protein-coupled receptor, rhodopsin-like,IPR001402:Prolactin-releasing p…
ENSBTAG00000019230 prostaglandin E receptor 3(PTGER3) Bos taurus GO:0006954~inflammatory response,GO:0007189~adenylate cyclase-activating G-protein coupled receptor signaling pathway,GO:0007200~phospholipase C-activating G-protein coupled receptor signaling pathway,GO:0007204~positive regulation of cytosolic calcium ion concentration,GO:0014827~intestine smooth muscle contraction,GO:0060455~negat…
ENSBTAG00000011027 prostaglandin reductase 1(PTGR1) Bos taurus GO:0006693~prostaglandin metabolic process,GO:0036102~leukotriene B4 metabolic process,GO:2001302~lipoxin A4 metabolic process, GO:0005737~cytoplasm, GO:0035798~2-alkenal reductase (NADP+) activity,GO:0036132~13-prostaglandin reductase activity,GO:0036185~13-lipoxin reductase activity,GO:0047522~15-oxoprostaglandin 13-oxidase activity…
ENSBTAG00000015919 prostate androgen-regulated mucin-like protein 1(PARM1) Bos taurus GO:0051973~positive regulation of telomerase activity, GO:0005654~nucleoplasm,GO:0005769~early endosome,GO:0005770~late endosome,GO:0005794~Golgi apparatus,GO:0005829~cytosol,GO:0005886~plasma membrane,GO:0016021~integral component of membrane, KW-0472~Membrane, KW-0732~Signal,KW-0812~Transmembrane,KW-1133~Trans…
ENSBTAG00000010381 protein arginine methyltransferase 9(PRMT9) Bos taurus GO:0006397~mRNA processing, GO:0005737~cytoplasm, GO:0035241~protein-arginine omega-N monomethyltransferase activity,GO:0035243~protein-arginine omega-N symmetric methyltransferase activity, IPR011990:Tetratricopeptide-like helical,IPR019734:Tetratricopeptide repeat,IPR025799:Protein arginine N-methyltransferase, KW-0802~TP…
ENSBTAG00000000545 protein phosphatase 4 regulatory subunit 3B(PPP4R3B) Bos taurus GO:0006470~protein dephosphorylation,GO:0045722~positive regulation of gluconeogenesis, GO:0005737~cytoplasm,GO:0005813~centrosome,GO:0016607~nuclear speck,GO:0030289~protein phosphatase 4 complex, IPR006887:Domain of unknown function DUF625,IPR011993:Pleckstrin homology-like domain,IPR016024:Armadillo-type fold, b…
ENSBTAG00000018596 protein tyrosine phosphatase non-receptor type 21(PTPN21) Bos taurus GO:0005737~cytoplasm,GO:0005856~cytoskeleton, GO:0004725~protein tyrosine phosphatase activity, IPR000242:Protein-tyrosine phosphatase, receptor/non-receptor type,IPR000299:FERM domain,IPR000387:Protein-tyrosine/Dual specificity phosphatase,IPR003595:Protein-tyrosine phosphatase, catalytic,IPR011993:Pleckstrin…
ENSBTAG00000020285 proteoglycan 3(PRG3) Bos taurus GO:0006955~immune response, GO:0030246~carbohydrate binding, IPR001304:C-type lectin,IPR002352:Eosinophil major basic protein,IPR016186:C-type lectin-like,IPR016187:C-type lectin fold,IPR018378:C-type lectin, conserved site, SM00034:CLECT, KW-0732~Signal, KW-0430~Lectin, KW-1015~Disulfide bond, COMPBIAS:Acidic residues,DOMAIN:C-type lectin,REGION…
ENSBTAG00000002007 proteoglycan 3(PRG3) Bos taurus GO:0006955~immune response, GO:0030246~carbohydrate binding, IPR001304:C-type lectin,IPR002352:Eosinophil major basic protein,IPR016186:C-type lectin-like,IPR016187:C-type lectin fold,IPR018378:C-type lectin, conserved site, SM00034:CLECT, KW-0732~Signal, KW-0430~Lectin, KW-1015~Disulfide bond, COMPBIAS:Acidic residues,DOMAIN:C-type lectin,REGION…
ENSBTAG00000053546 protocadherin alpha 13(PCDHA13) Bos taurus GO:0007155~cell adhesion,GO:0007156~homophilic cell adhesion via plasma membrane adhesion molecules,GO:0007399~nervous system development, GO:0005886~plasma membrane,GO:0005887~integral component of plasma membrane,GO:0016021~integral component of membrane, GO:0005509~calcium ion binding, IPR002126:Cadherin,IPR013164:Cadherin, N-termin…
ENSBTAG00000038241 replication initiator 1(REPIN1) Bos taurus General function prediction only, GO:0006260~DNA replication,GO:0006357~regulation of transcription from RNA polymerase II promoter, GO:0005654~nucleoplasm,GO:0005694~chromosome, GO:0043035~chromatin insulator sequence binding,GO:0046872~metal ion binding, IPR013087:Zinc finger C2H2-type/integrase DNA-binding domain, SM00355:ZnF_C2H2, …
ENSBTAG00000032493 reticulophagy regulator family member 3(RETREG3) Bos taurus GO:0010976~positive regulation of neuron projection development,GO:0061709~reticulophagy, GO:0016021~integral component of membrane,GO:0032991~macromolecular complex, KW-0472~Membrane, KW-0812~Transmembrane, COMPBIAS:Basic and acidic residues,COMPBIAS:Polar residues,REGION:Disordered,TRANSMEM:Helical,
ENSBTAG00000039329 retinoic acid early transcript 1G(RAET1G) Bos taurus GO:0005615~extracellular space,GO:0009897~external side of plasma membrane,GO:0016021~integral component of membrane, IPR011161:MHC class I-like antigen recognition,IPR011162:MHC classes I/II-like antigen recognition protein, bta04650:Natural killer cell mediated cytotoxicity, KW-0472~Membrane, KW-0732~Signal,KW-0812~Transmem…
ENSBTAG00000000490 rhotekin(RTKN) Bos taurus GO:0000281~mitotic cytokinesis,GO:0000915~actomyosin contractile ring assembly,GO:0007266~Rho protein signal transduction,GO:0031106~septin ring organization,GO:0032185~septin cytoskeleton organization,GO:0042981~regulation of apoptotic process, GO:0005826~actomyosin contractile ring, GO:0005095~GTPase inhibitor activity,GO:0031267~small GTPase binding…
ENSBTAG00000014588 ribosomal L1 domain containing 1(RSL1D1) Bos taurus GO:0000470~maturation of LSU-rRNA,GO:0032880~regulation of protein localization,GO:0042981~regulation of apoptotic process,GO:2000772~regulation of cellular senescence, GO:0005694~chromosome,GO:0005730~nucleolus,GO:0030686~90S preribosome, GO:0003723~RNA binding,GO:0003730~mRNA 3'-UTR binding,GO:0048027~mRNA 5'-UTR binding, IP…
ENSBTAG00000024582 ribosomal protein L10 like(RPL10L) Bos taurus GO:0000027~ribosomal large subunit assembly,GO:0006412~translation,GO:0007283~spermatogenesis, GO:0005634~nucleus,GO:0005783~endoplasmic reticulum,GO:0022625~cytosolic large ribosomal subunit, GO:0003735~structural constituent of ribosome, IPR001197:Ribosomal protein L10e,IPR016180:Ribosomal protein L10e/L16,IPR018255:Ribosomal prot…
ENSBTAG00000012898 ribosomal protein S27 like(RPS27L) Bos taurus GO:0000028~ribosomal small subunit assembly,GO:0006412~translation,GO:0006919~activation of cysteine-type endopeptidase activity involved in apoptotic process,GO:0006978~DNA damage response, signal transduction by p53 class mediator resulting in transcription of p21 class mediator,GO:0031571~mitotic G1 DNA damage checkpoint,GO:00427…
ENSBTAG00000052337 ribosomal protein S29(RPS29) Bos taurus GO:0002181~cytoplasmic translation,GO:0006412~translation, GO:0015935~small ribosomal subunit,GO:0022627~cytosolic small ribosomal subunit,GO:0042788~polysomal ribosome,GO:0098556~cytoplasmic side of rough endoplasmic reticulum membrane, GO:0003723~RNA binding,GO:0003735~structural constituent of ribosome,GO:0008270~zinc ion binding, IPR0…
ENSBTAG00000004913 ring finger protein 167(RNF167) Bos taurus GO:0006511~ubiquitin-dependent protein catabolic process,GO:0045786~negative regulation of cell cycle, GO:0005737~cytoplasm,GO:0016021~integral component of membrane, GO:0008270~zinc ion binding,GO:0061630~ubiquitin protein ligase activity, IPR001841:Zinc finger, RING-type,IPR003137:Protease-associated domain, PA,IPR011016:Zinc finger,…
ENSBTAG00000019667 ring finger protein 187(RNF187) Bos taurus GO:0010468~regulation of gene expression,GO:0016567~protein ubiquitination,GO:0043161~proteasome-mediated ubiquitin-dependent protein catabolic process,GO:0045087~innate immune response,GO:0045893~positive regulation of transcription, DNA-templated,GO:0051865~protein autoubiquitination,GO:0070936~protein K48-linked ubiquitination, GO:0…
ENSBTAG00000005340 secretion regulating guanine nucleotide exchange factor(SERGEF) Bos taurus Cell division and chromosome partitioning / Cytoskeleton, GO:0050709~negative regulation of protein secretion,GO:0050790~regulation of catalytic activity, GO:0005654~nucleoplasm,GO:0005829~cytosol, GO:0005085~guanyl-nucleotide exchange factor activity, IPR000408:Regulator of chromosome condensation, RCC1…
ENSBTAG00000031279 selenoprotein M(SELENOM) Bos taurus GO:0010269~response to selenium ion,GO:0035264~multicellular organism growth,GO:0035934~corticosterone secretion,GO:0042445~hormone metabolic process,GO:0060612~adipose tissue development, GO:0005788~endoplasmic reticulum lumen,GO:0005794~Golgi apparatus, GO:0016491~oxidoreductase activity, IPR014912:Sep15/SelM redox, KW-0732~Signal, DOMAIN:S…
ENSBTAG00000051403 sentrin-specific protease 8-like(LOC526877) Bos taurus GO:0008234~cysteine-type peptidase activity, IPR003653:Peptidase C48, SUMO/Sentrin/Ubl1, KW-0378~Hydrolase,KW-0645~Protease, DOMAIN:ULP_PROTEASE,
ENSBTAG00000022461 septin 10(SEPTIN10) Bos taurus Cell division and chromosome partitioning / Cytoskeleton, GO:0034613~cellular protein localization,GO:0061640~cytoskeleton-dependent cytokinesis, GO:0005856~cytoskeleton,GO:0005940~septin ring,GO:0015630~microtubule cytoskeleton,GO:0031105~septin complex,GO:0032153~cell division site, GO:0003924~GTPase activity,GO:0005525~GTP binding,GO:0060090~bi…
ENSBTAG00000053463 serine rich and transmembrane domain containing 2(SERTM2) Bos taurus GO:0016021~integral component of membrane,GO:0043231~intracellular membrane-bounded organelle, KW-0472~Membrane, KW-0812~Transmembrane,KW-1133~Transmembrane helix, REGION:Disordered,TRANSMEM:Helical,
ENSBTAG00000052162 serpin B4(LOC100337223) Bos taurus GO:0010951~negative regulation of endopeptidase activity, GO:0005615~extracellular space, GO:0004867~serine-type endopeptidase inhibitor activity, IPR000215:Serpin family,IPR023795:Protease inhibitor I4, serpin, conserved site,IPR023796:Serpin domain, SM00093:SERPIN, DOMAIN:SERPIN,
ENSBTAG00000037537 sialic acid-binding Ig-like lectin 13(LOC618463) Bos taurus GO:0007155~cell adhesion, GO:0005886~plasma membrane,GO:0016021~integral component of membrane, GO:0033691~sialic acid binding, IPR003598:Immunoglobulin subtype 2,IPR003599:Immunoglobulin subtype,IPR007110:Immunoglobulin-like domain,IPR013106:Immunoglobulin V-set,IPR013783:Immunoglobulin-like fold, SM00408:IGc2,SM00409…
ENSBTAG00000011275 signal peptide, CUB domain and EGF like domain containing 1(SCUBE1) Bos taurus GO:0007165~signal transduction,GO:0045880~positive regulation of smoothened signaling pathway, GO:0005615~extracellular space,GO:0009897~external side of plasma membrane,GO:0009986~cell surface,GO:0019897~extrinsic component of plasma membrane, GO:0005509~calcium ion binding,GO:0042802~identical prot…
ENSBTAG00000009508 single-pass membrane protein with aspartate rich tail 1(SMDT1) Bos taurus GO:0006851~mitochondrial calcium ion transport,GO:0036444~mitochondrial calcium uptake,GO:0051560~mitochondrial calcium ion homeostasis, GO:0005654~nucleoplasm,GO:0031305~integral component of mitochondrial inner membrane,GO:1990246~uniplex complex, IPR018782:Uncharacterised protein family UPF0466, KW-010…
ENSBTAG00000005108 slit guidance ligand 2(SLIT2) Bos taurus Function unknown, GO:0001657~ureteric bud development,GO:0001933~negative regulation of protein phosphorylation,GO:0002042~cell migration involved in sprouting angiogenesis,GO:0007411~axon guidance,GO:0008045~motor neuron axon guidance,GO:0010593~negative regulation of lamellipodium assembly,GO:0010596~negative regulation of endothelial …
ENSBTAG00000000848 small nuclear ribonucleoprotein U5 subunit 200(SNRNP200) Bos taurus General function prediction only, GO:0000388~spliceosome conformational change to release U4 (or U4atac) and U1 (or U11), GO:0005654~nucleoplasm,GO:0005681~spliceosomal complex,GO:0005682~U5 snRNP,GO:0046540~U4/U6 x U5 tri-snRNP complex,GO:0071005~U2-type precatalytic spliceosome,GO:0071006~U2-type catalytic st…
ENSBTAG00000050349 small ubiquitin-related modifier 1 pseudogene(LOC107132585) Bos taurus IPR000626:Ubiquitin, DOMAIN:Ubiquitin-like,
ENSBTAG00000003177 solute carrier family 25 member 33(SLC25A33) Bos taurus GO:0000002~mitochondrial genome maintenance,GO:0002082~regulation of oxidative phosphorylation,GO:0006390~transcription from mitochondrial promoter,GO:0006864~pyrimidine nucleotide transport,GO:0007005~mitochondrion organization,GO:0008284~positive regulation of cell proliferation,GO:0030307~positive regulation of cell gro…
ENSBTAG00000004612 sortilin related VPS10 domain containing receptor 3(SORCS3) Bos taurus GO:0016021~integral component of membrane,GO:0099061~integral component of postsynaptic density membrane, IPR000601:PKD domain,IPR006581:VPS10,IPR013783:Immunoglobulin-like fold,IPR015943:WD40/YVTN repeat-like-containing domain, SM00602:VPS10, KW-0472~Membrane, KW-0677~Repeat,KW-0732~Signal,KW-0812~Transmemb…
ENSBTAG00000020010 spermatogenesis associated 1(SPATA1) Bos taurus KW-0175~Coiled coil, COMPBIAS:Polar residues,DOMAIN:SPATA1_C,REGION:Disordered,
ENSBTAG00000015763 spermatogenesis associated 22(SPATA22) Bos taurus GO:0000711~meiotic DNA repair synthesis,GO:0007129~synapsis,GO:0007276~gamete generation,GO:0051445~regulation of meiotic cell cycle, GO:0005694~chromosome,GO:0016021~integral component of membrane, KW-0469~Meiosis, KW-0158~Chromosome,KW-0472~Membrane, KW-0812~Transmembrane,KW-1133~Transmembrane helix, COMPBIAS:Basic and acidic …
ENSBTAG00000011048 spermatogenesis associated 6 like(SPATA6L) Bos taurus GO:0007283~spermatogenesis, GO:0097224~sperm connecting piece, GO:0032027~myosin light chain binding, IPR027208:Spermatogenesis associated 6-like protein, KW-0597~Phosphoprotein, COMPBIAS:Polar residues,DOMAIN:SPATA6,REGION:Disordered,
ENSBTAG00000049782 spleen trypsin inhibitor(LOC404103) Bos taurus GO:0010951~negative regulation of endopeptidase activity, GO:0005615~extracellular space, GO:0004867~serine-type endopeptidase inhibitor activity, IPR002223:Proteinase inhibitor I2, Kunitz metazoa,IPR020901:Proteinase inhibitor I2, Kunitz, conserved site, SM00131:KU, KW-0964~Secreted, KW-0732~Signal, KW-0646~Protease inhibitor,KW-0…
ENSBTAG00000008250 sprouty RTK signaling antagonist 4(SPRY4) Bos taurus GO:0040037~negative regulation of fibroblast growth factor receptor signaling pathway,GO:0043407~negative regulation of MAP kinase activity,GO:0046580~negative regulation of Ras protein signal transduction,GO:0048513~animal organ development,GO:0070373~negative regulation of ERK1 and ERK2 cascade,GO:1900025~negative regulatio…
ENSBTAG00000004059 sterol O-acyltransferase 1(SOAT1) Bos taurus GO:0008203~cholesterol metabolic process,GO:0010742~macrophage derived foam cell differentiation,GO:0010878~cholesterol storage,GO:0033344~cholesterol efflux,GO:0034379~very-low-density lipoprotein particle assembly,GO:0034435~cholesterol esterification,GO:0042632~cholesterol homeostasis,GO:0042986~positive regulation of amyloid prec…
ENSBTAG00000020964 striatin interacting protein 1(STRIP1) Bos taurus GO:0007010~cytoskeleton organization,GO:0022604~regulation of cell morphogenesis,GO:0030866~cortical actin cytoskeleton organization, GO:0005634~nucleus,GO:0005829~cytosol, GO:0019901~protein kinase binding,GO:0031267~small GTPase binding, IPR012486:N1221-like,IPR021819:Protein of unknown function DUF3402, SM01292:SM01292,SM0129…
ENSBTAG00000005862 structural maintenance of chromosomes 4(SMC4) Bos taurus GO:0007076~mitotic chromosome condensation,GO:0010032~meiotic chromosome condensation,GO:0045132~meiotic chromosome segregation,GO:0051383~kinetochore organization, GO:0000775~chromosome, centromeric region,GO:0000796~condensin complex,GO:0005634~nucleus,GO:0005694~chromosome,GO:0005829~cytosol,GO:0016607~nuclear speck, G…
ENSBTAG00000020243 sushi, von Willebrand factor type A, EGF and pentraxin domain containing 1(SVEP1) Bos taurus GO:0003017~lymph circulation,GO:0008544~epidermis development,GO:0010467~gene expression,GO:0036303~lymph vessel morphogenesis,GO:0048014~Tie signaling pathway, GO:0005615~extracellular space,GO:0005634~nucleus,GO:0005737~cytoplasm, GO:0003682~chromatin binding,GO:0005509~calcium ion bi…
ENSBTAG00000015184 synapse defective Rho GTPase homolog 1(SYDE1) Bos taurus GO:0007165~signal transduction,GO:0016477~cell migration,GO:0031532~actin cytoskeleton reorganization,GO:0051493~regulation of cytoskeleton organization,GO:1901165~positive regulation of trophoblast cell migration, GO:0005096~GTPase activator activity, IPR000008:C2 calcium-dependent membrane targeting,IPR000198:Rho GTPase…
ENSBTAG00000011209 synaptotagmin 11(SYT11) Bos taurus GO:0001778~plasma membrane repair,GO:0006906~vesicle fusion,GO:0006914~autophagy,GO:0007612~learning,GO:0007613~memory,GO:0014059~regulation of dopamine secretion,GO:0016192~vesicle-mediated transport,GO:0017156~calcium ion regulated exocytosis,GO:0017158~regulation of calcium ion-dependent exocytosis,GO:0032715~negative regulation of interleu…
ENSBTAG00000032508 taste 2 receptor member 1(TAS2R1) Bos taurus GO:0001580~detection of chemical stimulus involved in sensory perception of bitter taste, GO:0016021~integral component of membrane, GO:0004930~G-protein coupled receptor activity,GO:0033038~bitter taste receptor activity, IPR007960:Mammalian taste receptor, bta04742:Taste transduction, KW-0919~Taste, KW-0472~Membrane, KW-0812~Transm…
ENSBTAG00000007439 teneurin transmembrane protein 4(TENM4) Bos taurus Cell envelope biogenesis, outer membrane, GO:0001702~gastrulation with mouth forming second,GO:0007157~heterophilic cell-cell adhesion via plasma membrane cell adhesion molecules,GO:0007165~signal transduction,GO:0031643~positive regulation of myelination,GO:0032289~central nervous system myelin formation,GO:0048666~neuron deve…
ENSBTAG00000009655 tensin 3(TNS3) Bos taurus GO:0035556~intracellular signal transduction, GO:0005829~cytosol,GO:0005925~focal adhesion, IPR000387:Protein-tyrosine/Dual specificity phosphatase,IPR000980:SH2 domain,IPR002219:Protein kinase C-like, phorbol ester/diacylglycerol binding,IPR003595:Protein-tyrosine phosphatase, catalytic,IPR006020:Phosphotyrosine interaction domain,IPR011993:Pleckstrin…
ENSBTAG00000011406 testis associated actin remodelling kinase 1(TESK1) Bos taurus GO:0001934~positive regulation of protein phosphorylation,GO:0030036~actin cytoskeleton organization,GO:0042326~negative regulation of phosphorylation,GO:0051496~positive regulation of stress fiber assembly,GO:0051650~establishment of vesicle localization,GO:0090521~glomerular visceral epithelial cell migration,GO:1…
ENSBTAG00000017682 tet methylcytosine dioxygenase 2(TET2) Bos taurus GO:0006211~5-methylcytosine catabolic process,GO:0006493~protein O-linked glycosylation,GO:0030099~myeloid cell differentiation,GO:0045944~positive regulation of transcription from RNA polymerase II promoter,GO:0070989~oxidative demethylation,GO:0080111~DNA demethylation,GO:0080182~histone H3-K4 trimethylation, GO:0005634~nucleu…
ENSBTAG00000012343 tetraspanin 5(TSPAN5) Bos taurus GO:0045747~positive regulation of Notch signaling pathway,GO:0051604~protein maturation,GO:0072659~protein localization to plasma membrane, GO:0005887~integral component of plasma membrane,GO:0016021~integral component of membrane, GO:0019899~enzyme binding, IPR000301:Tetraspanin,IPR008952:Tetraspanin, EC2 domain,IPR018499:Tetraspanin/Peripherin…
ENSBTAG00000054776 thioredoxin domain containing 17(TXNDC17) Bos taurus GO:0033209~tumor necrosis factor-mediated signaling pathway, GO:0005829~cytosol, GO:0004601~peroxidase activity,GO:0047134~protein-disulfide reductase activity, IPR010357:Protein of unknown function DUF953, thioredoxin-like, DOMAIN:DUF953,
ENSBTAG00000000256 transducin-like enhancer of split 1 (E(sp1) homolog, Drosophila)(TLE1) Bos taurus GO:0006355~regulation of transcription, DNA-templated,GO:0010628~positive regulation of gene expression,GO:0016055~Wnt signaling pathway,GO:0043124~negative regulation of I-kappaB kinase/NF-kappaB signaling,GO:0090090~negative regulation of canonical Wnt signaling pathway,GO:2000811~negative regul…
ENSBTAG00000004599 transgelin 3(TAGLN3) Bos taurus Cytoskeleton, GO:0000122~negative regulation of transcription from RNA polymerase II promoter, GO:0005634~nucleus, IPR000557:Calponin repeat,IPR001715:Calponin homology domain,IPR003096:Smooth muscle protein/calponin, SM00033:CH, KW-0597~Phosphoprotein, DOMAIN:Calponin-homology (CH),REGION:Disordered,REPEAT:Calponin-like,
ENSBTAG00000039630 transmembrane p24 trafficking protein 2(TMED2) Bos taurus GO:0006886~intracellular protein transport,GO:0006888~ER to Golgi vesicle-mediated transport,GO:0007030~Golgi organization,GO:0015031~protein transport, GO:0005783~endoplasmic reticulum,GO:0005789~endoplasmic reticulum membrane,GO:0005793~endoplasmic reticulum-Golgi intermediate compartment,GO:0005794~Golgi apparatus,GO:…
ENSBTAG00000045594 transmembrane protein 121(TMEM121) Bos taurus GO:0016021~integral component of membrane, KW-0472~Membrane, KW-0812~Transmembrane,KW-1133~Transmembrane helix, COMPBIAS:Pro residues,REGION:Disordered,TRANSMEM:Helical,
ENSBTAG00000032588 transmembrane protein 150C(TMEM150C) Bos taurus GO:0019230~proprioception,GO:0034220~ion transmembrane transport,GO:0071260~cellular response to mechanical stimulus, GO:0005765~lysosomal membrane,GO:0005886~plasma membrane,GO:0005887~integral component of plasma membrane, GO:0008381~mechanically-gated ion channel activity, IPR019402:Frag1/DRAM/Sfk1, KW-0458~Lysosome,KW-0472~Mem…
ENSBTAG00000012900 transmembrane protein 229B(TMEM229B) Bos taurus GO:0009617~response to bacterium, GO:0016021~integral component of membrane, IPR010540:Protein of unknown function DUF1113, TMEM229, KW-0472~Membrane, KW-0812~Transmembrane,KW-1133~Transmembrane helix, TOPO_DOM:Cytoplasmic,TOPO_DOM:Extracellular,TRANSMEM:Helical,
ENSBTAG00000016713 transmembrane protein 30B(TMEM30B) Bos taurus GO:0045332~phospholipid translocation,GO:0070863~positive regulation of protein exit from endoplasmic reticulum, GO:0005783~endoplasmic reticulum,GO:0005794~Golgi apparatus,GO:0005886~plasma membrane,GO:0016021~integral component of membrane, GO:0015247~aminophospholipid transporter activity, IPR005045:Protein of unknown function DU…
ENSBTAG00000045579 transmembrane protein 60(LOC100295750) Bos taurus GO:0016021~integral component of membrane, IPR019396:Transmembrane Fragile-X-F-associated protein, KW-0472~Membrane, KW-0812~Transmembrane,KW-1133~Transmembrane helix, TRANSMEM:Helical,
ENSBTAG00000053102 tripartite motif-containing protein 64-like(LOC112444922) Bos taurus GO:0010468~regulation of gene expression,GO:0016567~protein ubiquitination,GO:0045087~innate immune response, GO:0005737~cytoplasm, GO:0008270~zinc ion binding,GO:0061630~ubiquitin protein ligase activity, IPR000315:Zinc finger, B-box,IPR001841:Zinc finger, RING-type,IPR001870:B30.2/SPRY domain,IPR003877:SPla/…
ENSBTAG00000018122 trophoblast Kunitz domain protein 1(TKDP1) Bos taurus GO:0010951~negative regulation of endopeptidase activity, GO:0005615~extracellular space, GO:0004867~serine-type endopeptidase inhibitor activity, IPR002223:Proteinase inhibitor I2, Kunitz metazoa,IPR020901:Proteinase inhibitor I2, Kunitz, conserved site, SM00131:KU, KW-0964~Secreted, KW-0175~Coiled coil,KW-0677~Repeat,KW-07…
ENSBTAG00000004381 tumor associated calcium signal transducer 2(TACSTD2) Bos taurus GO:2000738~positive regulation of stem cell differentiation, GO:0005615~extracellular space,GO:0005634~nucleus,GO:0016021~integral component of membrane, IPR000716:Thyroglobulin type-1, SM00211:TY, KW-0472~Membrane, KW-0732~Signal,KW-0812~Transmembrane,KW-1133~Transmembrane helix, KW-1015~Disulfide bond, DOMAIN:Th…
ENSBTAG00000020985 tyrosinase related protein 1(TYRP1) Bos taurus GO:0030318~melanocyte differentiation,GO:0032438~melanosome organization,GO:0042438~melanin biosynthetic process,GO:0043438~acetoacetic acid metabolic process,GO:0048023~positive regulation of melanin biosynthetic process, GO:0005737~cytoplasm,GO:0010008~endosome membrane,GO:0016021~integral component of membrane,GO:0030669~clathri…
ENSBTAG00000000695 ubiquitin associated protein 2(UBAP2) Bos taurus GO:0005634~nucleus,GO:0005737~cytoplasm, IPR009060:UBA-like,IPR015940:Ubiquitin-associated/translation elongation factor EF1B, N-terminal, eukaryote,IPR022166:Protein of unknown function DUF3697, ubiquitin-associated protein 2, SM00165:UBA, KW-0597~Phosphoprotein, COMPBIAS:Basic and acidic residues,COMPBIAS:Polar residues,DOMAIN:…
ENSBTAG00000030838 ubiquitin carboxyl-terminal hydrolase 17-like protein 6(LOC112446467) Bos taurus GO:0006511~ubiquitin-dependent protein catabolic process,GO:0016579~protein deubiquitination,GO:0042981~regulation of apoptotic process, GO:0005634~nucleus,GO:0005783~endoplasmic reticulum,GO:0005829~cytosol, GO:0004197~cysteine-type endopeptidase activity,GO:0004843~thiol-dependent ubiquitin-speci…
ENSBTAG00000030892 ubiquitin carboxyl-terminal hydrolase 17-like protein 6(LOC790134) Bos taurus GO:0006511~ubiquitin-dependent protein catabolic process,GO:0016579~protein deubiquitination,GO:0042981~regulation of apoptotic process, GO:0005634~nucleus,GO:0005783~endoplasmic reticulum,GO:0005829~cytosol, GO:0004197~cysteine-type endopeptidase activity,GO:0004843~thiol-dependent ubiquitin-specific…
ENSBTAG00000048761 ubiquitin conjugating enzyme E2 D3(UBE2D3) Bos taurus GO:0000209~protein polyubiquitination,GO:0006281~DNA repair,GO:0006513~protein monoubiquitination,GO:0006915~apoptotic process,GO:0043161~proteasome-mediated ubiquitin-dependent protein catabolic process,GO:0051865~protein autoubiquitination,GO:0070936~protein K48-linked ubiquitination,GO:0070979~protein K11-linked ubiquitin…
ENSBTAG00000008805 ubiquitin specific peptidase 3(USP3) Bos taurus GO:0000278~mitotic cell cycle,GO:0006281~DNA repair,GO:0006511~ubiquitin-dependent protein catabolic process,GO:0016578~histone deubiquitination,GO:0016579~protein deubiquitination,GO:0031647~regulation of protein stability, GO:0000785~chromatin,GO:0005634~nucleus,GO:0005654~nucleoplasm,GO:0005737~cytoplasm,GO:0036464~cytoplasmic …
ENSBTAG00000002898 unc-45 myosin chaperone B(UNC45B) Bos taurus GO:0007517~muscle organ development,GO:0030154~cell differentiation,GO:0061077~chaperone-mediated protein folding, GO:0005829~cytosol, GO:0051879~Hsp90 protein binding, IPR000225:Armadillo,IPR011989:Armadillo-like helical,IPR011990:Tetratricopeptide-like helical,IPR016024:Armadillo-type fold,IPR019734:Tetratricopeptide repeat,IPR0246…
ENSBTAG00000033445 uncharacterized LOC100126053(LOC100126053) Bos taurus GO:0006357~regulation of transcription from RNA polymerase II promoter, GO:0005634~nucleus, GO:0000978~RNA polymerase II core promoter proximal region sequence-specific DNA binding,GO:0003700~transcription factor activity, sequence-specific DNA binding,GO:0043565~sequence-specific DNA binding, IPR000232:Heat shock factor (HS…
ENSBTAG00000038660 uncharacterized LOC618600(MGC134232) Bos taurus COMPBIAS:Basic and acidic residues,DOMAIN:ARF7EP_C,REGION:Disordered,
ENSBTAG00000051616 uncharacterized LOC784741(LOC784741) Bos taurus COMPBIAS:Basic and acidic residues,COMPBIAS:Polar residues,DOMAIN:ARF7EP_C,REGION:Disordered,
ENSBTAG00000031575 vav guanine nucleotide exchange factor 3(VAV3) Bos taurus GO:0006974~cellular response to DNA damage stimulus,GO:0008361~regulation of cell size,GO:0030890~positive regulation of B cell proliferation,GO:0035556~intracellular signal transduction,GO:0042493~response to drug,GO:0043087~regulation of GTPase activity,GO:0050853~B cell receptor signaling pathway, GO:0001772~immunolog…
ENSBTAG00000049615 vesicle associated membrane protein 7(VAMP7) Bos taurus Intracellular trafficking and secretion, GO:0006887~exocytosis,GO:0006888~ER to Golgi vesicle-mediated transport,GO:0006906~vesicle fusion,GO:0006911~phagocytosis, engulfment,GO:0008333~endosome to lysosome transport,GO:0015031~protein transport,GO:0016192~vesicle-mediated transport,GO:0017156~calcium ion regulated exocyto…
ENSBTAG00000027431 zinc finger protein 227(ZNF227) Bos taurus General function prediction only, GO:0006357~regulation of transcription from RNA polymerase II promoter,GO:0045944~positive regulation of transcription from RNA polymerase II promoter, GO:0005634~nucleus, GO:0000978~RNA polymerase II core promoter proximal region sequence-specific DNA binding,GO:0001228~transcriptional activator activ…
ENSBTAG00000000297 zinc finger protein 330(ZNF330) Bos taurus GO:0000775~chromosome, centromeric region,GO:0005634~nucleus,GO:0005730~nucleolus, GO:0008270~zinc ion binding, IPR010531:NOA36, KW-0137~Centromere,KW-0158~Chromosome,KW-0539~Nucleus, KW-0677~Repeat,KW-0863~Zinc-finger, KW-0479~Metal-binding,KW-0862~Zinc, KW-0597~Phosphoprotein, COMPBIAS:Acidic residues,COMPBIAS:Basic and acidic residu…
ENSBTAG00000037710 zinc finger protein 331(LOC100336984) Bos taurus GO:0006355~regulation of transcription, DNA-templated,GO:0006357~regulation of transcription from RNA polymerase II promoter, GO:0005634~nucleus, GO:0000978~RNA polymerase II core promoter proximal region sequence-specific DNA binding,GO:0000981~RNA polymerase II transcription factor activity, sequence-specific DNA binding,GO:000…
ENSBTAG00000006587 zinc finger protein 367(ZNF367) Bos taurus General function prediction only, GO:0006357~regulation of transcription from RNA polymerase II promoter, GO:0005654~nucleoplasm, GO:0000978~RNA polymerase II core promoter proximal region sequence-specific DNA binding,GO:0000981~RNA polymerase II transcription factor activity, sequence-specific DNA binding, IPR013087:Zinc finger C2H2-…
ENSBTAG00000020445 zinc finger protein 398(ZNF398) Bos taurus General function prediction only, GO:0006357~regulation of transcription from RNA polymerase II promoter, GO:0000978~RNA polymerase II core promoter proximal region sequence-specific DNA binding,GO:0003700~transcription factor activity, sequence-specific DNA binding,GO:0046872~metal ion binding, IPR001909:Krueppel-associated box,IPR003…
ENSBTAG00000039341 zinc finger protein 525(LOC100296121) Bos taurus GO:0006357~regulation of transcription from RNA polymerase II promoter, GO:0000978~RNA polymerase II core promoter proximal region sequence-specific DNA binding,GO:0000981~RNA polymerase II transcription factor activity, sequence-specific DNA binding, IPR013087:Zinc finger C2H2-type/integrase DNA-binding domain, bta05168:Herpes s…
ENSBTAG00000000728 zinc finger protein 597(ZNF597) Bos taurus GO:0000122~negative regulation of transcription from RNA polymerase II promoter,GO:0006357~regulation of transcription from RNA polymerase II promoter, GO:0000977~RNA polymerase II regulatory region sequence-specific DNA binding,GO:0000981~RNA polymerase II transcription factor activity, sequence-specific DNA binding,GO:0001227~transcr…
ENSBTAG00000047954 zinc finger protein 75D(ZNF75D) Bos taurus GO:0006355~regulation of transcription, DNA-templated,GO:0006357~regulation of transcription from RNA polymerase II promoter, GO:0005634~nucleus, GO:0000978~RNA polymerase II core promoter proximal region sequence-specific DNA binding,GO:0000981~RNA polymerase II transcription factor activity, sequence-specific DNA binding,GO:0003677~D…
ENSBTAG00000039946 zinc finger protein 814(ZNF814) Bos taurus GO:0006355~regulation of transcription, DNA-templated, IPR001909:Krueppel-associated box, SM00349:KRAB, DOMAIN:KRAB,

## Sheet: sheet2
Function classification of the genes contains at least one DMR(q<0.05)
sperm
ENSBTAG00000032650 dpy-19 like 2(DPY19L2) Bos taurus GO:0007286~spermatid development,GO:0018406~protein C-linked glycosylation via 2'-alpha-mannosyl-L-tryptophan, GO:0005637~nuclear inner membrane,GO:0016021~integral component of membrane, GO:0000030~mannosyltransferase activity, IPR018732:Dpy-19, KW-0472~Membrane, KW-0812~Transmembrane, COMPBIAS:Basic and acidic residues,REGION:Disordered,TRANS…
ENSBTAG00000050199 germ cell-less, spermatogenesis associated 1 pseudogene(LOC786530) Bos taurus GO:0007281~germ cell development, GO:0005634~nucleus, IPR000210:BTB/POZ-like,IPR011333:BTB/POZ fold, SM00225:BTB, KW-0217~Developmental protein,KW-9996~Developmental protein, COMPBIAS:Acidic residues,COMPBIAS:Basic and acidic residues,DOMAIN:BTB,REGION:Disordered,
ENSBTAG00000007807 heat shock protein family A (Hsp70) member 2(HSPA2) Bos taurus GO:0001934~positive regulation of protein phosphorylation,GO:0007141~male meiosis I,GO:0007283~spermatogenesis,GO:0007286~spermatid development,GO:0009408~response to heat,GO:0009409~response to cold,GO:0010971~positive regulation of G2/M transition of mitotic cell cycle,GO:0016192~vesicle-mediated transport,GO:0030…
ENSBTAG00000024582 ribosomal protein L10 like(RPL10L) Bos taurus GO:0000027~ribosomal large subunit assembly,GO:0006412~translation,GO:0007283~spermatogenesis, GO:0005634~nucleus,GO:0005783~endoplasmic reticulum,GO:0022625~cytosolic large ribosomal subunit, GO:0003735~structural constituent of ribosome, IPR001197:Ribosomal protein L10e,IPR016180:Ribosomal protein L10e/L16,IPR018255:Ribosomal prot…
ENSBTAG00000020010 spermatogenesis associated 1(SPATA1) Bos taurus KW-0175~Coiled coil, COMPBIAS:Polar residues,DOMAIN:SPATA1_C,REGION:Disordered,
ENSBTAG00000011048 spermatogenesis associated 6 like(SPATA6L) Bos taurus GO:0007283~spermatogenesis, GO:0097224~sperm connecting piece, GO:0032027~myosin light chain binding, IPR027208:Spermatogenesis associated 6-like protein, KW-0597~Phosphoprotein, COMPBIAS:Polar residues,DOMAIN:SPATA6,REGION:Disordered,
ENSBTAG00000015763 spermatogenesis associated 22(SPATA22) Bos taurus GO:0000711~meiotic DNA repair synthesis,GO:0007129~synapsis,GO:0007276~gamete generation,GO:0051445~regulation of meiotic cell cycle, GO:0005694~chromosome,GO:0016021~integral component of membrane, KW-0469~Meiosis, KW-0158~Chromosome,KW-0472~Membrane, KW-0812~Transmembrane,KW-1133~Transmembrane helix, COMPBIAS:Basic and acidic …
testis
ENSBTAG00000011406 testis associated actin remodelling kinase 1(TESK1) Bos taurus GO:0001934~positive regulation of protein phosphorylation,GO:0030036~actin cytoskeleton organization,GO:0042326~negative regulation of phosphorylation,GO:0051496~positive regulation of stress fiber assembly,GO:0051650~establishment of vesicle localization,GO:0090521~glomerular visceral epithelial cell migration,GO:1…
androgen
ENSBTAG00000015919 prostate androgen-regulated mucin-like protein 1(PARM1) Bos taurus GO:0051973~positive regulation of telomerase activity, GO:0005654~nucleoplasm,GO:0005769~early endosome,GO:0005770~late endosome,GO:0005794~Golgi apparatus,GO:0005829~cytosol,GO:0005886~plasma membrane,GO:0016021~integral component of membrane, KW-0472~Membrane, KW-0732~Signal,KW-0812~Transmembrane,KW-1133~Trans…
germ cell
ENSBTAG00000047411 BTB domain-containing protein (G3N038_BOVIN) Bos taurus GO:0007281~germ cell development, GO:0005634~nucleus, IPR000210:BTB/POZ-like,IPR011333:BTB/POZ fold, SM00225:BTB, KW-0217~Developmental protein,KW-9996~Developmental protein, COMPBIAS:Basic and acidic residues,DOMAIN:BTB,REGION:Disordered,
ENSBTAG00000016186 germ cell-less protein-like 2(LOC112445444) Bos taurus GO:0007281~germ cell development, GO:0005634~nucleus, IPR000210:BTB/POZ-like,IPR011333:BTB/POZ fold, SM00225:BTB, KW-0217~Developmental protein,KW-9996~Developmental protein, DOMAIN:BTB,REGION:Disordered,
ENSBTAG00000016186 germ cell-less protein-like 2(LOC112445444) Bos taurus GO:0007281~germ cell development, GO:0005634~nucleus, IPR000210:BTB/POZ-like,IPR011333:BTB/POZ fold, SM00225:BTB, KW-0217~Developmental protein,KW-9996~Developmental protein, DOMAIN:BTB,REGION:Disordered,
ENSBTAG00000050199 germ cell-less, spermatogenesis associated 1 pseudogene(LOC786530) Bos taurus GO:0007281~germ cell development, GO:0005634~nucleus, IPR000210:BTB/POZ-like,IPR011333:BTB/POZ fold, SM00225:BTB, KW-0217~Developmental protein,KW-9996~Developmental protein, COMPBIAS:Acidic residues,COMPBIAS:Basic and acidic residues,DOMAIN:BTB,REGION:Disordered,
ENSBTAG00000007807 heat shock protein family A (Hsp70) member 2(HSPA2) Bos taurus GO:0001934~positive regulation of protein phosphorylation,GO:0007141~male meiosis I,GO:0007283~spermatogenesis,GO:0007286~spermatid development,GO:0009408~response to heat,GO:0009409~response to cold,GO:0010971~positive regulation of G2/M transition of mitotic cell cycle,GO:0016192~vesicle-mediated transport,GO:0030…
embryo
ENSBTAG00000016629 adenylate cyclase 9(ADCY9) Bos taurus GO:0001701~in utero embryonic development,GO:0006171~cAMP biosynthetic process,GO:0007189~adenylate cyclase-activating G-protein coupled receptor signaling pathway,GO:0035556~intracellular signal transduction,GO:0071880~adenylate cyclase-activating adrenergic receptor signaling pathway, GO:0005887~integral component of plasma membrane, GO:0…
ENSBTAG00000006209 exostosin glycosyltransferase 1(EXT1) Bos taurus GO:0001958~endochondral ossification,GO:0001974~blood vessel remodeling,GO:0002067~glandular epithelial cell differentiation,GO:0002524~hypersensitivity,GO:0003128~heart field specification,GO:0003415~chondrocyte hypertrophy,GO:0003416~endochondral bone growth,GO:0006486~protein glycosylation,GO:0007033~vacuole organization,GO:00…
ENSBTAG00000035084 frizzled class receptor 3(FZD3) Bos taurus GO:0001736~establishment of planar polarity,GO:0001764~neuron migration,GO:0001843~neural tube closure,GO:0001942~hair follicle development,GO:0002052~positive regulation of neuroblast proliferation,GO:0033278~cell proliferation in midbrain,GO:0036342~post-anal tail morphogenesis,GO:0036514~dopaminergic neuron axon guidance,GO:0036515~…
ENSBTAG00000020406 glypican 3(GPC3) Bos taurus GO:0001658~branching involved in ureteric bud morphogenesis,GO:0009617~response to bacterium,GO:0009948~anterior/posterior axis specification,GO:0010171~body morphogenesis,GO:0016477~cell migration,GO:0030282~bone mineralization,GO:0030316~osteoclast differentiation,GO:0030324~lung development,GO:0030513~positive regulation of BMP signaling pathway,G…
ENSBTAG00000007173 platelet derived growth factor receptor alpha(PDGFRA) Bos taurus GO:0001553~luteinization,GO:0001701~in utero embryonic development,GO:0002244~hematopoietic progenitor cell differentiation,GO:0006935~chemotaxis,GO:0007169~transmembrane receptor protein tyrosine kinase signaling pathway,GO:0007204~positive regulation of cytosolic calcium ion concentration,GO:0008210~estrogen met…
ENSBTAG00000006051 N-myristoyltransferase 1(NMT1) Bos taurus Lipid metabolism, GO:0001701~in utero embryonic development,GO:0006499~N-terminal protein myristoylation,GO:0018008~N-terminal peptidyl-glycine N-myristoylation,GO:0042180~cellular ketone metabolic process, GO:0005737~cytoplasm,GO:0005829~cytosol,GO:0005886~plasma membrane,GO:0016020~membrane,GO:0019898~extrinsic component of membrane, …
ENSBTAG00000014278 T-box transcription factor 2(TBX2) Bos taurus GO:0001708~cell fate specification,GO:0003148~outflow tract septum morphogenesis,GO:0003256~regulation of transcription from RNA polymerase II promoter involved in myocardial precursor cell differentiation,GO:0003272~endocardial cushion formation,GO:0006357~regulation of transcription from RNA polymerase II promoter,GO:0007219~Notch…
ENSBTAG00000011384 T-box transcription factor 5(TBX5) Bos taurus GO:0001708~cell fate specification,GO:0002009~morphogenesis of an epithelium,GO:0003167~atrioventricular bundle cell differentiation,GO:0003181~atrioventricular valve morphogenesis,GO:0003197~endocardial cushion development,GO:0003218~cardiac left ventricle formation,GO:0003281~ventricular septum development,GO:0006357~regulation of…
pregnancy
ENSBTAG00000019772 oxytocin receptor(OXTR) Bos taurus GO:0001992~regulation of systemic arterial blood pressure by vasopressin,GO:0007186~G-protein coupled receptor signaling pathway,GO:0007565~female pregnancy,GO:0045777~positive regulation of blood pressure,GO:0045907~positive regulation of vasoconstriction,GO:0060137~maternal process involved in parturition, GO:0005887~integral component of pl…
estrogen
ENSBTAG00000009789 G protein subunit alpha q(GNAQ) Bos taurus GO:0001508~action potential,GO:0006469~negative regulation of protein kinase activity,GO:0007188~adenylate cyclase-modulating G-protein coupled receptor signaling pathway,GO:0007189~adenylate cyclase-activating G-protein coupled receptor signaling pathway,GO:0007213~G-protein coupled acetylcholine receptor signaling pathway,GO:0007215~…
ENSBTAG00000016629 adenylate cyclase 9(ADCY9) Bos taurus GO:0001701~in utero embryonic development,GO:0006171~cAMP biosynthetic process,GO:0007189~adenylate cyclase-activating G-protein coupled receptor signaling pathway,GO:0035556~intracellular signal transduction,GO:0071880~adenylate cyclase-activating adrenergic receptor signaling pathway, GO:0005887~integral component of plasma membrane, GO:0…
ENSBTAG00000007807 heat shock protein family A (Hsp70) member 2(HSPA2) Bos taurus GO:0001934~positive regulation of protein phosphorylation,GO:0007141~male meiosis I,GO:0007283~spermatogenesis,GO:0007286~spermatid development,GO:0009408~response to heat,GO:0009409~response to cold,GO:0010971~positive regulation of G2/M transition of mitotic cell cycle,GO:0016192~vesicle-mediated transport,GO:0030…
ENSBTAG00000007173 platelet derived growth factor receptor alpha(PDGFRA) Bos taurus GO:0001553~luteinization,GO:0001701~in utero embryonic development,GO:0002244~hematopoietic progenitor cell differentiation,GO:0006935~chemotaxis,GO:0007169~transmembrane receptor protein tyrosine kinase signaling pathway,GO:0007204~positive regulation of cytosolic calcium ion concentration,GO:0008210~estrogen met…
placenta
ENSBTAG00000008389 HtrA serine peptidase 1(HTRA1) Bos taurus Posttranslational modification, protein turnover, chaperones, GO:0001890~placenta development,GO:0030512~negative regulation of transforming growth factor beta receptor signaling pathway,GO:0030514~negative regulation of BMP signaling pathway,GO:0060718~chorionic trophoblast cell differentiation, GO:0005576~extracellular region,GO:00058…
ENSBTAG00000012555 RNA binding motif protein 15(RBM15) Bos taurus GO:0000122~negative regulation of transcription from RNA polymerase II promoter,GO:0000381~regulation of alternative mRNA splicing, via spliceosome,GO:0000398~mRNA splicing, via spliceosome,GO:0001510~RNA methylation,GO:0001569~branching involved in blood vessel morphogenesis,GO:0007221~positive regulation of transcription of Notch…
mammary
ENSBTAG00000014278 T-box transcription factor 2(TBX2) Bos taurus GO:0001708~cell fate specification,GO:0003148~outflow tract septum morphogenesis,GO:0003256~regulation of transcription from RNA polymerase II promoter involved in myocardial precursor cell differentiation,GO:0003272~endocardial cushion formation,GO:0006357~regulation of transcription from RNA polymerase II promoter,GO:0007219~Notch…
oocyte
ENSBTAG00000016629 adenylate cyclase 9(ADCY9) Bos taurus GO:0001701~in utero embryonic development,GO:0006171~cAMP biosynthetic process,GO:0007189~adenylate cyclase-activating G-protein coupled receptor signaling pathway,GO:0035556~intracellular signal transduction,GO:0071880~adenylate cyclase-activating adrenergic receptor signaling pathway, GO:0005887~integral component of plasma membrane, GO:0…
trophoblast
ENSBTAG00000015184 synapse defective Rho GTPase homolog 1(SYDE1) Bos taurus GO:0007165~signal transduction,GO:0016477~cell migration,GO:0031532~actin cytoskeleton reorganization,GO:0051493~regulation of cytoskeleton organization,GO:1901165~positive regulation of trophoblast cell migration, GO:0005096~GTPase activator activity, IPR000008:C2 calcium-dependent membrane targeting,IPR000198:Rho GTPase…
ENSBTAG00000018122 trophoblast Kunitz domain protein 1(TKDP1) Bos taurus GO:0010951~negative regulation of endopeptidase activity, GO:0005615~extracellular space, GO:0004867~serine-type endopeptidase inhibitor activity, IPR002223:Proteinase inhibitor I2, Kunitz metazoa,IPR020901:Proteinase inhibitor I2, Kunitz, conserved site, SM00131:KU, KW-0964~Secreted, KW-0175~Coiled coil,KW-0677~Repeat,KW-07…
ENSBTAG00000008389 HtrA serine peptidase 1(HTRA1) Bos taurus Posttranslational modification, protein turnover, chaperones, GO:0001890~placenta development,GO:0030512~negative regulation of transforming growth factor beta receptor signaling pathway,GO:0030514~negative regulation of BMP signaling pathway,GO:0060718~chorionic trophoblast cell differentiation, GO:0005576~extracellular region,GO:00058…
uterus
ENSBTAG00000008275 GREB1 like retinoic acid receptor coactivator(GREB1L) Bos taurus GO:0001656~metanephros development,GO:0001658~branching involved in ureteric bud morphogenesis,GO:0001822~kidney development,GO:0003231~cardiac ventricle development,GO:0030539~male genitalia development,GO:0060065~uterus development,GO:0061205~paramesonephric duct development,GO:0072177~mesonephric duct developme…
X chro inactive
ENSBTAG00000012555 RNA binding motif protein 15(RBM15) Bos taurus GO:0000122~negative regulation of transcription from RNA polymerase II promoter,GO:0000381~regulation of alternative mRNA splicing, via spliceosome,GO:0000398~mRNA splicing, via spliceosome,GO:0001510~RNA methylation,GO:0001569~branching involved in blood vessel morphogenesis,GO:0007221~positive regulation of transcription of Notch…
ENSBTAG00000012659 ligand dependent nuclear receptor interacting factor 1(LRIF1) Bos taurus GO:0006355~regulation of transcription, DNA-templated,GO:0009048~dosage compensation by inactivation of X chromosome, GO:0000781~chromosome, telomeric region,GO:0001740~Barr body,GO:0005654~nucleoplasm,GO:0034451~centriolar satellite, GO:0042974~retinoic acid receptor binding, IPR026191:Ligand-dependent nu…

## Sheet: Sheet3
The 37 genes associated with development(genes covered at least one DMR(q<0.05))
ID Gene Name Species COG_ONTOLOGY GOTERM_BP_DIRECT GOTERM_CC_DIRECT GOTERM_MF_DIRECT INTERPRO KEGG_PATHWAY PIR_SUPERFAMILY SMART UP_KW_BIOLOGICAL_PROCESS UP_KW_CELLULAR_COMPONENT UP_KW_DISEASE UP_KW_DOMAIN UP_KW_LIGAND UP_KW_MOLECULAR_FUNCTION UP_KW_PTM UP_SEQ_FEATURE
ENSBTAG00000047411 BTB domain-containing protein (G3N038_BOVIN) Bos taurus GO:0007281~germ cell development, GO:0005634~nucleus, IPR000210:BTB/POZ-like,IPR011333:BTB/POZ fold, SM00225:BTB, KW-0217~Developmental protein,KW-9996~Developmental protein, COMPBIAS:Basic and acidic residues,DOMAIN:BTB,REGION:Disordered,
ENSBTAG00000038281 CUB and Sushi multiple domains 3(CSMD3) Bos taurus GO:0050773~regulation of dendrite development, GO:0005886~plasma membrane,GO:0016021~integral component of membrane, IPR000436:Sushi/SCR/CCP,IPR000859:CUB domain, SM00032:CCP,SM00042:CUB, KW-0472~Membrane, KW-0768~Sushi,KW-0812~Transmembrane,KW-1133~Transmembrane helix, DOMAIN:CUB,DOMAIN:Sushi,REGION:Disordered,TRANSMEM:Helical,
ENSBTAG00000008275 GREB1 like retinoic acid receptor coactivator(GREB1L) Bos taurus GO:0001656~metanephros development,GO:0001658~branching involved in ureteric bud morphogenesis,GO:0001822~kidney development,GO:0003231~cardiac ventricle development,GO:0030539~male genitalia development,GO:0060065~uterus development,GO:0061205~paramesonephric duct development,GO:0072177~mesonephric duct developme…
ENSBTAG00000008389 HtrA serine peptidase 1(HTRA1) Bos taurus Posttranslational modification, protein turnover, chaperones, GO:0001890~placenta development,GO:0030512~negative regulation of transforming growth factor beta receptor signaling pathway,GO:0030514~negative regulation of BMP signaling pathway,GO:0060718~chorionic trophoblast cell differentiation, GO:0005576~extracellular region,GO:00058…
ENSBTAG00000006051 N-myristoyltransferase 1(NMT1) Bos taurus Lipid metabolism, GO:0001701~in utero embryonic development,GO:0006499~N-terminal protein myristoylation,GO:0018008~N-terminal peptidyl-glycine N-myristoylation,GO:0042180~cellular ketone metabolic process, GO:0005737~cytoplasm,GO:0005829~cytosol,GO:0005886~plasma membrane,GO:0016020~membrane,GO:0019898~extrinsic component of membrane, …
ENSBTAG00000020570 PR/SET domain 8(PRDM8) Bos taurus GO:0006355~regulation of transcription, DNA-templated,GO:0014003~oligodendrocyte development, GO:0005634~nucleus, IPR001214:SET domain, KW-0175~Coiled coil, DOMAIN:SET,REGION:Disordered,
ENSBTAG00000012555 RNA binding motif protein 15(RBM15) Bos taurus GO:0000122~negative regulation of transcription from RNA polymerase II promoter,GO:0000381~regulation of alternative mRNA splicing, via spliceosome,GO:0000398~mRNA splicing, via spliceosome,GO:0001510~RNA methylation,GO:0001569~branching involved in blood vessel morphogenesis,GO:0007221~positive regulation of transcription of Notch…
ENSBTAG00000023891 RNA binding motif protein 20(RBM20) Bos taurus GO:0007507~heart development,GO:0033120~positive regulation of RNA splicing,GO:0043484~regulation of RNA splicing, GO:0005634~nucleus, GO:0003729~mRNA binding,GO:0008270~zinc ion binding, IPR000504:RNA recognition motif domain,IPR000690:Zinc finger, C2H2-type matrin,IPR003604:Zinc finger, U1-type,IPR012677:Nucleotide-binding, alpha…
ENSBTAG00000033180 SET and MYND domain containing 3(SMYD3) Bos taurus GO:0006334~nucleosome assembly,GO:0006469~negative regulation of protein kinase activity,GO:0014904~myotube cell development,GO:0033138~positive regulation of peptidyl-serine phosphorylation,GO:0034968~histone lysine methylation,GO:0045184~establishment of protein localization,GO:0045944~positive regulation of transcription fro…
ENSBTAG00000014278 T-box transcription factor 2(TBX2) Bos taurus GO:0001708~cell fate specification,GO:0003148~outflow tract septum morphogenesis,GO:0003256~regulation of transcription from RNA polymerase II promoter involved in myocardial precursor cell differentiation,GO:0003272~endocardial cushion formation,GO:0006357~regulation of transcription from RNA polymerase II promoter,GO:0007219~Notch…
ENSBTAG00000011384 T-box transcription factor 5(TBX5) Bos taurus GO:0001708~cell fate specification,GO:0002009~morphogenesis of an epithelium,GO:0003167~atrioventricular bundle cell differentiation,GO:0003181~atrioventricular valve morphogenesis,GO:0003197~endocardial cushion development,GO:0003218~cardiac left ventricle formation,GO:0003281~ventricular septum development,GO:0006357~regulation of…
ENSBTAG00000014751 Zic family member 1(ZIC1) Bos taurus Transcription / Cell division and chromosome partitioning, GO:0006357~regulation of transcription from RNA polymerase II promoter,GO:0007417~central nervous system development,GO:0007420~brain development, GO:0005634~nucleus,GO:0005654~nucleoplasm, GO:0000978~RNA polymerase II core promoter proximal region sequence-specific DNA binding,GO:00…
ENSBTAG00000016629 adenylate cyclase 9(ADCY9) Bos taurus GO:0001701~in utero embryonic development,GO:0006171~cAMP biosynthetic process,GO:0007189~adenylate cyclase-activating G-protein coupled receptor signaling pathway,GO:0035556~intracellular signal transduction,GO:0071880~adenylate cyclase-activating adrenergic receptor signaling pathway, GO:0005887~integral component of plasma membrane, GO:0…
ENSBTAG00000009125 aldehyde dehydrogenase 1 family member A3(ALDH1A3) Bos taurus GO:0002072~optic cup morphogenesis involved in camera-type eye development,GO:0002138~retinoic acid biosynthetic process,GO:0007626~locomotory behavior,GO:0021768~nucleus accumbens development,GO:0042472~inner ear morphogenesis,GO:0042574~retinal metabolic process,GO:0043065~positive regulation of apoptotic process,G…
ENSBTAG00000033339 ankyrin repeat and LEM domain containing 2(ANKLE2) Bos taurus GO:0007049~cell cycle,GO:0007084~mitotic nuclear envelope reassembly,GO:0007417~central nervous system development,GO:0035307~positive regulation of protein dephosphorylation,GO:0042326~negative regulation of phosphorylation,GO:0043066~negative regulation of apoptotic process,GO:0051301~cell division, GO:0005783~endo…
ENSBTAG00000032650 dpy-19 like 2(DPY19L2) Bos taurus GO:0007286~spermatid development,GO:0018406~protein C-linked glycosylation via 2'-alpha-mannosyl-L-tryptophan, GO:0005637~nuclear inner membrane,GO:0016021~integral component of membrane, GO:0000030~mannosyltransferase activity, IPR018732:Dpy-19, KW-0472~Membrane, KW-0812~Transmembrane, COMPBIAS:Basic and acidic residues,REGION:Disordered,TRANS…
ENSBTAG00000006209 exostosin glycosyltransferase 1(EXT1) Bos taurus GO:0001958~endochondral ossification,GO:0001974~blood vessel remodeling,GO:0002067~glandular epithelial cell differentiation,GO:0002524~hypersensitivity,GO:0003128~heart field specification,GO:0003415~chondrocyte hypertrophy,GO:0003416~endochondral bone growth,GO:0006486~protein glycosylation,GO:0007033~vacuole organization,GO:00…
ENSBTAG00000035084 frizzled class receptor 3(FZD3) Bos taurus GO:0001736~establishment of planar polarity,GO:0001764~neuron migration,GO:0001843~neural tube closure,GO:0001942~hair follicle development,GO:0002052~positive regulation of neuroblast proliferation,GO:0033278~cell proliferation in midbrain,GO:0036342~post-anal tail morphogenesis,GO:0036514~dopaminergic neuron axon guidance,GO:0036515~…
ENSBTAG00000016186 germ cell-less protein-like 2(LOC112445444) Bos taurus GO:0007281~germ cell development, GO:0005634~nucleus, IPR000210:BTB/POZ-like,IPR011333:BTB/POZ fold, SM00225:BTB, KW-0217~Developmental protein,KW-9996~Developmental protein, DOMAIN:BTB,REGION:Disordered,
ENSBTAG00000050199 germ cell-less, spermatogenesis associated 1 pseudogene(LOC786530) Bos taurus GO:0007281~germ cell development, GO:0005634~nucleus, IPR000210:BTB/POZ-like,IPR011333:BTB/POZ fold, SM00225:BTB, KW-0217~Developmental protein,KW-9996~Developmental protein, COMPBIAS:Acidic residues,COMPBIAS:Basic and acidic residues,DOMAIN:BTB,REGION:Disordered,
ENSBTAG00000020406 glypican 3(GPC3) Bos taurus GO:0001658~branching involved in ureteric bud morphogenesis,GO:0009617~response to bacterium,GO:0009948~anterior/posterior axis specification,GO:0010171~body morphogenesis,GO:0016477~cell migration,GO:0030282~bone mineralization,GO:0030316~osteoclast differentiation,GO:0030324~lung development,GO:0030513~positive regulation of BMP signaling pathway,G…
ENSBTAG00000007807 heat shock protein family A (Hsp70) member 2(HSPA2) Bos taurus GO:0001934~positive regulation of protein phosphorylation,GO:0007141~male meiosis I,GO:0007283~spermatogenesis,GO:0007286~spermatid development,GO:0009408~response to heat,GO:0009409~response to cold,GO:0010971~positive regulation of G2/M transition of mitotic cell cycle,GO:0016192~vesicle-mediated transport,GO:0030…
ENSBTAG00000003514 heat shock transcription factor 4(HSF4) Bos taurus GO:0000122~negative regulation of transcription from RNA polymerase II promoter,GO:0006357~regulation of transcription from RNA polymerase II promoter,GO:0007601~visual perception,GO:0008284~positive regulation of cell proliferation,GO:0033169~histone H3-K9 demethylation,GO:0043010~camera-type eye development,GO:0045597~positiv…
ENSBTAG00000018474 interleukin 6 receptor(IL6R) Bos taurus GO:0008284~positive regulation of cell proliferation,GO:0010536~positive regulation of activation of Janus kinase activity,GO:0010573~vascular endothelial growth factor production,GO:0019221~cytokine-mediated signaling pathway,GO:0031018~endocrine pancreas development,GO:0032722~positive regulation of chemokine production,GO:0032755~posit…
ENSBTAG00000012817 jagged canonical Notch ligand 1(JAG1) Bos taurus GO:0001953~negative regulation of cell-matrix adhesion,GO:0001974~blood vessel remodeling,GO:0002011~morphogenesis of an epithelial sheet,GO:0002456~T cell mediated immunity,GO:0003184~pulmonary valve morphogenesis,GO:0003215~cardiac right ventricle morphogenesis,GO:0007219~Notch signaling pathway,GO:0022408~negative regulation o…
ENSBTAG00000010689 neuregulin 2(NRG2) Bos taurus GO:0007399~nervous system development,GO:0035556~intracellular signal transduction,GO:0048513~animal organ development, GO:0005576~extracellular region,GO:0005615~extracellular space,GO:0016021~integral component of membrane, GO:0005102~receptor binding,GO:0008083~growth factor activity, IPR000742:Epidermal growth factor-like domain,IPR002154:Neure…
ENSBTAG00000009265 nuclear receptor subfamily 5 group A member 2(NR5A2) Bos taurus GO:0006357~regulation of transcription from RNA polymerase II promoter,GO:0008206~bile acid metabolic process,GO:0009755~hormone-mediated signaling pathway,GO:0009888~tissue development,GO:0030855~epithelial cell differentiation,GO:0042127~regulation of cell proliferation,GO:0042632~cholesterol homeostasis,GO:00450…
ENSBTAG00000009059 paired like homeodomain 2(PITX2) Bos taurus Transcription, GO:0006357~regulation of transcription from RNA polymerase II promoter,GO:0009653~anatomical structure morphogenesis,GO:0035993~deltoid tuberosity development,GO:0042476~odontogenesis,GO:0045944~positive regulation of transcription from RNA polymerase II promoter,GO:0061072~iris morphogenesis, GO:0005634~nucleus,GO:0005…
ENSBTAG00000007173 platelet derived growth factor receptor alpha(PDGFRA) Bos taurus GO:0001553~luteinization,GO:0001701~in utero embryonic development,GO:0002244~hematopoietic progenitor cell differentiation,GO:0006935~chemotaxis,GO:0007169~transmembrane receptor protein tyrosine kinase signaling pathway,GO:0007204~positive regulation of cytosolic calcium ion concentration,GO:0008210~estrogen met…
ENSBTAG00000053546 protocadherin alpha 13(PCDHA13) Bos taurus GO:0007155~cell adhesion,GO:0007156~homophilic cell adhesion via plasma membrane adhesion molecules,GO:0007399~nervous system development, GO:0005886~plasma membrane,GO:0005887~integral component of plasma membrane,GO:0016021~integral component of membrane, GO:0005509~calcium ion binding, IPR002126:Cadherin,IPR013164:Cadherin, N-termin…
ENSBTAG00000032493 reticulophagy regulator family member 3(RETREG3) Bos taurus GO:0010976~positive regulation of neuron projection development,GO:0061709~reticulophagy, GO:0016021~integral component of membrane,GO:0032991~macromolecular complex, KW-0472~Membrane, KW-0812~Transmembrane, COMPBIAS:Basic and acidic residues,COMPBIAS:Polar residues,REGION:Disordered,TRANSMEM:Helical,
ENSBTAG00000031279 selenoprotein M(SELENOM) Bos taurus GO:0010269~response to selenium ion,GO:0035264~multicellular organism growth,GO:0035934~corticosterone secretion,GO:0042445~hormone metabolic process,GO:0060612~adipose tissue development, GO:0005788~endoplasmic reticulum lumen,GO:0005794~Golgi apparatus, GO:0016491~oxidoreductase activity, IPR014912:Sep15/SelM redox, KW-0732~Signal, DOMAIN:S…
ENSBTAG00000005108 slit guidance ligand 2(SLIT2) Bos taurus Function unknown, GO:0001657~ureteric bud development,GO:0001933~negative regulation of protein phosphorylation,GO:0002042~cell migration involved in sprouting angiogenesis,GO:0007411~axon guidance,GO:0008045~motor neuron axon guidance,GO:0010593~negative regulation of lamellipodium assembly,GO:0010596~negative regulation of endothelial …
ENSBTAG00000008250 sprouty RTK signaling antagonist 4(SPRY4) Bos taurus GO:0040037~negative regulation of fibroblast growth factor receptor signaling pathway,GO:0043407~negative regulation of MAP kinase activity,GO:0046580~negative regulation of Ras protein signal transduction,GO:0048513~animal organ development,GO:0070373~negative regulation of ERK1 and ERK2 cascade,GO:1900025~negative regulatio…
ENSBTAG00000020243 sushi, von Willebrand factor type A, EGF and pentraxin domain containing 1(SVEP1) Bos taurus GO:0003017~lymph circulation,GO:0008544~epidermis development,GO:0010467~gene expression,GO:0036303~lymph vessel morphogenesis,GO:0048014~Tie signaling pathway, GO:0005615~extracellular space,GO:0005634~nucleus,GO:0005737~cytoplasm, GO:0003682~chromatin binding,GO:0005509~calcium ion bi…
ENSBTAG00000007439 teneurin transmembrane protein 4(TENM4) Bos taurus Cell envelope biogenesis, outer membrane, GO:0001702~gastrulation with mouth forming second,GO:0007157~heterophilic cell-cell adhesion via plasma membrane cell adhesion molecules,GO:0007165~signal transduction,GO:0031643~positive regulation of myelination,GO:0032289~central nervous system myelin formation,GO:0048666~neuron deve…
